# Supplementary material for: Efficient transfer hydrogenation of ketones using molybdenum complexes by comprehensively verifying the auxiliary ligands
Source: Royal Society of Chemistry journal article supplement (doi:10.1039/d2dt01177h), 2022-01-01
Supplement: d2dt01177h1.pdf [file d2dt01177h1.pdf]

**Efficient transfer hydrogenation of ketones by molybdenum complexes through comprehensively verifying auxiliary ligands**

Zheng Wang,<sup>\*abc</sup> Yahuan Liu,<sup>b</sup> Mingyang Han,<sup>c</sup> Ning Ma,<sup>a</sup> Quanming Lyu,<sup>a</sup> Qingbin Liu,<sup>\*b</sup> and Wen-Hua Sun<sup>\*.c</sup>

<sup>a</sup> College of Science, Hebei Agricultural University, Baoding 071001, China

<sup>b</sup> Hebei Key Laboratory of Organic Functional Molecules, College of Chemistry and Material Science, Hebei Normal University, Shijiazhuang 050024, China

<sup>c</sup> Key Laboratory of Engineering Plastics and Beijing National Laboratory for Molecular Science, Institute of Chemistry, Chinese Academy of Sciences, Beijing 100190, China

**Table of contents**

|           |                                                               |     |
|-----------|---------------------------------------------------------------|-----|
| <b>1.</b> | <b>General information</b>                                    | S2  |
| <b>2.</b> | <b>Syntheses and characterization of molybdenum complexes</b> | S3  |
| <b>3.</b> | <b>NMR and IR spectra for molybdenum complexes</b>            | S7  |
| <b>4.</b> | <b>Catalytic study</b>                                        | S19 |
| <b>5.</b> | <b>Characterization of selected alcohol products</b>          | S22 |
| <b>6.</b> | <b>X-ray structure determination</b>                          | S37 |
| <b>7.</b> | <b>References</b>                                             | S38 |

## 1 • General information

All manipulations and their complexes were carried out under a nitrogen atmosphere using standard Schlenk techniques. All solvents were dried and distilled under nitrogen prior to use. All the liquid substrates and solid substrates (Table S1) were used directly without further purification. Mo(CO)<sub>6</sub>, NaBHET<sub>3</sub> (1 M in THF) were purchased from Sigma-Aldrich. Mo( $\eta^3$ -allyl)(CO)<sub>2</sub>(CH<sub>3</sub>CN)<sub>2</sub>Br and Mo(PPh<sub>3</sub>)<sub>2</sub>(CO)<sub>2</sub>(CH<sub>3</sub>CN)<sub>2</sub> were prepared according to literature procedures.<sup>1,2</sup> The tridentate ligands (**L1** – **L4**) containing 5,6,7,8-tetrahydroquinolin-8-amine were prepared using a previously reported procedure.<sup>3</sup> <sup>1</sup>H, <sup>13</sup>C and <sup>31</sup>P NMR spectra were recorded on Bruker AV $\square$ 400 NMR and Bruker AV $\square$ 500 NMR spectrometers. Chemical shift values in <sup>1</sup>H and <sup>13</sup>C NMR spectra were referenced internally to the residual solvent resonances, whereas <sup>31</sup>P NMR spectra were referenced externally to H<sub>3</sub>PO<sub>4</sub>. Elemental analysis was carried out with a Vario EL III CHN microanalyzer. Infrared spectroscopy was performed in the solid state on a Bruker ALPHA. GC was performed using a FuLi 9790II instrument using an Agilent HP-INNOWAX column (30m  $\times$  0.320mm  $\times$  0.25 $\mu$ m, Part number: 19091N-113I): injector temp. 300 °C, detector temp. 300 °C, column temp. 80 °C, withdraw time 2 min, then 20 °C /min to 240 °C keeping for 5 min, then 20 °C/min to 280 °C, withdraw time for 5 min.

**Table S1** CAS numbers for substrates and products

| Products                      | CAS number | Substrates                 | CAS number |
|-------------------------------|------------|----------------------------|------------|
| 1-Phenylethanol               | 13323-81-4 | Acetophenone               | 98-86-2    |
| 1-(4-Fluorophenyl)ethanol     | 403-41-8   | 4'-Fluoroacetophenone      | 403-42-9   |
| 1-(4-Chlorophenyl)ethanol     | 3391-10-4  | 4'-Chloroacetophenone      | 99-91-2    |
| 1-(4-Bromophenyl)ethanol      | 5391-88-8  | 4'-Bromoacetophenone       | 99-90-1    |
| 1-(4-Methylphenyl)ethanol     | 536-50-5   | 4'-Methylacetophenone      | 122-00-9   |
| 1-(4-Methoxyphenyl)ethanol    | 3319-15-1  | 4'-Methoxyacetophenone     | 100-06-1   |
| 1-(4-Nitrophenyl)ethanol      | 6531-13-1  | 4-Nitroacetophenone        | 100-19-6   |
| 4-(1-Hydroxyethyl)benzotrile  | 52067-35-3 | 4-Acetylbenzotrile         | 1443-80-7  |
| 1-(3-Methoxy-phenyl)ethanol   | 23308-82-9 | 3-Methoxyacetophenone      | 586-37-8   |
| 1-(3-Methylphenyl)ethanol     | 25675-28-9 | 3'-Methylacetophenone      | 585-74-0   |
| 1-(3-Fluorophenyl)ethanol     | 402-63-1   | 3'-Fluoroacetophenone      | 455-36-7   |
| 1-(3-Chlorophenyl)ethanol     | 6939-95-3  | 3'-Chloroacetophenone      | 99-02-5    |
| 1-(3-Bromophenyl)ethanol      | 52780-14-0 | 3'-Bromoacetophenone       | 2142-63-4  |
| 1-(2-Methoxyphenyl)ethanol    | 13513-82-1 | 2'-Methoxyacetophenone     | 579-74-8   |
| 1-(2-Methylphenyl) ethanol    | 7287-82-3  | 2'-Methylacetophenone      | 577-16-2   |
| 1-(2-Fluorophenyl)ethanol     | 445-26-1   | 2'-Fluoroacetophenone      | 445-27-2   |
| 1-(2-Chlorophenyl)ethanol     | 13524-04-4 | 2'-Chloroacetophenone      | 2142-68-9  |
| 1-(2-Bromophenyl)ethanol      | 5411-56-3  | 2'-Bromoacetophenone       | 2142-69-0  |
| 1-(2,4-Dichlorophenyl)ethanol | 1475-13-4  | 2',4'-Dichloroacetophenone | 2234-16-4  |
| 1-Phenyl-1-butanol            | 614-14-2   | Butyrophenone              | 495-40-9   |
| 1-(4-Methylphenyl)-1-propanol | 25574-04-3 | 4'-Methylpropiophenone     | 5337-93-9  |
| 1-(3-chlorophenyl)propan-1-ol | 32019-30-0 | 3'-Chloropropiophenone     | 34841-35-5 |
| 2-Methyl-1-phenyl-1-propanol  | 611-69-8   | Isobutyrophenone           | 611-70-1   |
| 1-(1-Naphthyl)ethanol         | 57605-95-5 | 1'-Acetonaphthone          | 941-98-0   |

|                                            |            |                                      |           |
|--------------------------------------------|------------|--------------------------------------|-----------|
| 1-(2-Naphthyl)eyhanol                      | 40295-80-5 | 2-Acetonaphthone                     | 93-08-3   |
| Benzoylcyclohexane                         | 712-50-5   | Benzoylcyclohexane                   | 712-50-5  |
| Benzhydrol                                 | 91-01-0    | Benzophenone                         | 119-61-9  |
| 1,2,3,4-Tetrahydro-1-naphthol              | 529-33-9   | 1-Tetralone                          | 529-34-0  |
| 1-Indanol                                  | 6351-10-6  | 1-Indanone                           | 83-33-0   |
| 1-(Hydroxyphenylmethyl)<br>cyclohexan-1-ol | 1135-72-4  | 1-Hydroxycyclohexyl<br>phenyl ketone | 947-19-3  |
| 1-(Thiophen-2-yl)ethan-1-ol                | 78002-44-5 | 2-Acetylthiophene                    | 88-15-3   |
| 1-Pyidin-2-yl- ethanol                     | 18728-61-5 | 2-Acetylpyridine                     | 1122-62-9 |
| 1-(2-Furyl)ethanol                         | 4208-64-4  | 2-Acetylfuran                        | 1192-62-7 |
| Cyclopentanol                              | 96-41-3    | Cyclopentanone                       | 120-92-3  |
| Cyclohexanol                               | 108-93-0   | Cyclohexanone                        | 108-94-1  |
| Cycloheptanol                              | 502-41-0   | Cycloheptanone                       | 502-42-1  |
| Cyclooctanol                               | 96-41-3    | Cyclooctanone                        | 502-49-8  |
| Cyclododecanol                             | 1724-39-6  | Cyclododecanone                      | 830-13-7  |
| Cyclopentadecanol                          | 4727-17-7  | Cyclopentadecanone                   | 502-72-7  |
| 4-Phenylcyclohexanol                       | 5437-46-7  | 4-Phenylcyclohexanone                | 4894-75-1 |
| 4-t-Butylcyclohexanone                     | 98-53-3    | 4-t-Butylcyclohexanol                | 98-52-2   |
| 3-Quinuclidinol                            | 1619-34-7  | 3-Quinuclidinone                     | 3731-38-2 |
| 3-Heptanone                                | 106-35-4   | 3-Hydroxyheptane                     | 589-82-2  |
| 2-Pentanone                                | 107-87-9   | 2-Pentanol                           | 6032-29-7 |
| 3-Penten-2-one                             | 625-33-2   | 3-Penten-2-ol                        | 1569-50-2 |

## 2. Syntheses and characterization of the ligands and complexes

### 2.2.1 Synthesis of $[8-(2-R_2N)C_2H_4NHC_9H_{10}N](CO)_3Mo$ (**Mo1** – **Mo3**)<sup>1,2</sup>

a)  $R_2N = Me_2N$ , **Mo1**

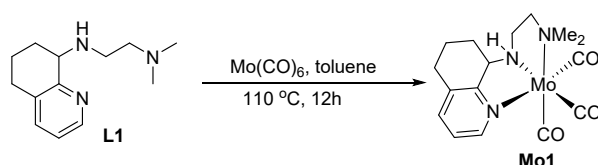

Under a  $N_2$  atmosphere, a mixture of  $N^1,N^1$ -dimethyl- $N^2$ -(5,6,7,8-tetrahydroquinolin-8-yl)ethane-1,2-diamine (**L1**, 219 mg, 1 mmol) and  $Mo(CO)_6$  (265 mg, 1 mmol) in 10 mL toluene was added to a 25 mL Shrek bottle. the reaction mixture was kept stirring at 110 °C for 12 h, and the resulting orange-red suspension was cooled to room temperature. The orange precipitate was filtered off, washed three times with 2 mL of toluene, and afterward redissolved in 2 mL DCM. Ether (20 mL) was added until product precipitation occurred. The resulting organe solid was filtered off, washed two times with 5 mL of ether, and dried in vacuo to yield 325 mg (81%) of **Mo1** as an orange solid. Crystals suitable for X-ray analysis were obtained by slowly allowing a layer of ether to diffuse into a saturated solution of **Mo1** in DCM.

$^1H$  NMR (500 MHz,  $DMSO-d_6$ )  $\delta$  8.67 (d,  $J = 4.7$  Hz, 1H), 7.67 (d,  $J = 7.6$  Hz, 1H), 7.31 (dd,  $J = 7.6, 5.4$  Hz, 1H), 5.78 (s, 1H), 4.21 – 4.15 (m, 1H), 2.80 – 2.76 (m, 3H), 2.74 (s, 3H), 2.46 (s, 1H), 2.15 (d,  $J = 9.1$  Hz, 1H), 2.08 – 2.01 (m, 1H), 1.99-1.93 (m, 3H), 1.90 (s, 3H), 1.75 (dd,  $J = 14.3, 6.5$  Hz, 1H);  $^{13}C$  NMR (100 MHz,  $DMSO-d_6$ )  $\delta$  157.67, 150.02, 138.38, 135.78, 123.67, 62.73, 61.57, 55.90, 47.50, 42.32, 28.02, 26.96, 21.38, CO not observed; FT-IR ( $cm^{-1}$ , KBr): 1728 (s,  $\nu_{CO}$ ), 1771 (s,  $\nu_{CO}$ ), 1897 (s,  $\nu_{CO}$ ), 3278 (m,  $\nu_{NH}$ ); Anal. Calcd for **Mo1** (399.31)  $[C_{16}H_{21}MoN_3O_3]$ : C, 48.13; H, 5.30; N, 10.52; Found: C,

48.11, H, 5.34, N, 10.45.

**Caution:** Carbon monoxide is released upon addition/heating of the suspension. Allow for adequate ventilation and use of personal safety equipment.

b)  $R_2N = Et_2N$ , **Mo2**

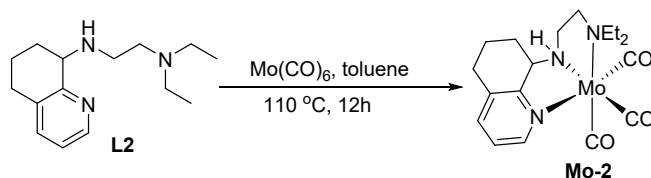

Using a similar procedure and molar ratios (**L2**, 247 mg, 1 mmol and  $Mo(CO)_6$ , 265 mg, 1 mmol) to that described for **Mo1**, **Mo2** was isolated as an orange powder (375 mg, 87%).  $^1H$  NMR (500 MHz, DMSO-*d*)  $\delta$  8.64 (d,  $J = 4.3$  Hz, 1H), 7.66 (d,  $J = 7.4$  Hz, 1H), 7.31 (dd,  $J = 7.6, 5.4$  Hz, 1H), 5.77 (s, 1H, NH), 4.21 – 4.12 (m, 1H), 3.25-3.21 (m, 1H), 2.94 – 2.90 (m, 1H), 2.77 (d,  $J = 6.7$  Hz, 3H), 2.43 (d,  $J = 11.5$  Hz, 1H), 2.31 (d,  $J = 7.9$  Hz, 1H), 2.17-2.13 (m, 1H), 2.07-2.03 (m, 1H), 2.00 – 1.92 (m, 2H), 1.92 – 1.83 (m, 2H), 1.81-1.74 (m, 1H), 1.09 (t,  $J = 7.2$  Hz, 3H), 0.98 (t,  $J = 7.1$  Hz, 3H);  $^{13}C$  NMR (100 MHz, DMSO)  $\delta$  158.03, 149.89, 138.62, 136.00, 123.85, 63.07, 56.74, 53.80, 47.58, 44.87, 41.92, 28.40, 27.34, 21.76, 9.61, 9.50, CO not observed; FT-IR ( $cm^{-1}$ , KBr): 1728 (s,  $\nu_{CO}$ ), 1775 (s,  $\nu_{CO}$ ), 1894 (s,  $\nu_{CO}$ ), 3274 (m,  $\nu_{NH}$ ); Anal. Calcd for **Mo2** (427.37) [ $C_{18}H_{25}MoN_3O_3$ ]: C, 50.59; H, 5.90; N, 9.83; Found: C, 50.61, H, 5.94, N, 9.75.

c)  $R_2N = i-Pr_2N$ , **Mo3**

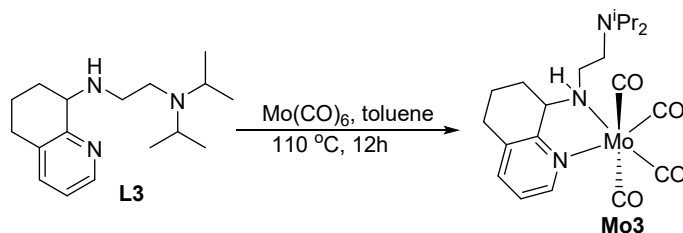

Using a similar procedure and molar ratios (**L3**, 275 mg, 1 mmol and  $Mo(CO)_6$ , 265 mg, 1 mmol) to that described for **Mo1**, **Mo3** was isolated as an orange powder (415 mg, 85%).

$^1H$  NMR (500 MHz, DMSO-*d*)  $\delta$  8.59 (d,  $J = 4.7$  Hz, 1H), 7.71 (d,  $J = 7.5$  Hz, 1H), 7.31 (dd,  $J = 7.6, 5.4$  Hz, 1H), 4.52 – 4.45 (m, 1H), 3.84 (s, 1H), 3.08 – 2.94 (m, 4H), 2.82-2.65 (m, 4H), 1.99 (d,  $J = 10.6$  Hz, 1H), 1.78 – 1.72 (m, 1H), 1.54 (dd,  $J = 23.1, 11.1$  Hz, 1H), 1.20 (d,  $J = 6.5$  Hz, 1H), 1.01 (dd,  $J = 13.3, 6.5$  Hz, 12H);  $^{13}C$  NMR (100 MHz, DMSO-*d*)  $\delta$  208.91(C=O), 206.71(C=O), 158.61, 150.11, 138.93, 135.63, 123.67, 64.35, 48.74, 46.77, 44.32, 28.16, 27.67, 21.15, 20.56, 19.29; FT-IR ( $cm^{-1}$ , KBr): 1815 (s,  $\nu_{CO}$ ), 1861 (s,  $\nu_{CO}$ ), 1885 (s,  $\nu_{CO}$ ), 2006 (s,  $\nu_{CO}$ ), 3207 (m,  $\nu_{NH}$ ); Anal. Calcd for **Mo3** (483.43) [ $C_{21}H_{29}MoN_3O_4$ ]: C, 52.18; H, 6.05; N, 8.69; Found: C, 52.13, H, 6.08, N, 8.61.

## 2.2.2 Synthesis of [8-(2- $R_2N$ ) $C_2H_4NHC_9H_{10}N$ ](CO) $_2$ MoBr (**Mo4 – Mo6**)

a)  $R_2N = Me_2N$ , **Mo4**

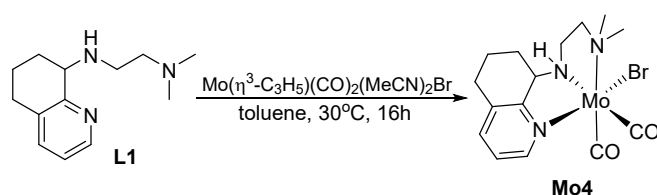

In a 25 mL Shrek bottle, a mixture of  $N^1, N^1$ -dimethyl- $N^2$ -(5,6,7,8-tetrahydroquinolin-8-yl)ethane-1,2-diamine (**L1**, 219 mg, 1 mmol) and  $Mo(\eta^3-C_3H_5)(CO)_2(MeCN)_2Br$  (355 mg, 1 mmol) in 10 mL toluene. the reaction mixture was kept

stirring at 30 °C for 16 h. An orange suspension was obtained and the solvent was concentrated to 3 mL in vacuo, the orange-brown solid was filtered and was washed two times with 2 mL of toluene, and afterward redissolved in 2 mL DCM. Ether (20 mL) was added until product precipitation occurred again. The resulting brown solid was filtered off, washed two times with 5 mL of ether, and dried in vacuo to yield 310 mg (68%) of **Mo4** as a pale-brown power.

$^1\text{H}$  NMR (500 MHz, DMSO-*d*)  $\delta$  8.49 (br, 1H), 7.83 (d,  $J = 7.0$  Hz, 2H), 7.51-7.48 (m, 2H), 4.58 (s, 1H), 4.21 (br, 1H), 2.94 – 2.91 (m, 2H), 2.85-2.76 (m, 2H), 2.56 (s, 3H), 2.21-2.18 (m, 2H), 2.06-2.02 (m, 2H), 1.79 (s, 3H), 1.41 – 1.19 (m, 2H);  $^{13}\text{C}$  NMR (125 MHz, DMSO-*d*)  $\delta$  157.04, 149.77, 143.08, 136.15, 125.54, 60.69, 59.95, 53.65, 49.96, 41.97, 27.84, 26.38, 21.10; FT-IR ( $\text{cm}^{-1}$ , KBr): 1841 (s,  $\nu_{\text{CO}}$ ), 1934 (s,  $\nu_{\text{CO}}$ ), 3424 (m,  $\nu_{\text{NH}}$ ); Anal. Calcd for **Mo4** (451.21) [ $\text{C}_{15}\text{H}_{21}\text{BrMoN}_3\text{O}_2$ ]: C, 39.93; H, 4.69; N, 9.31; Found: C, 39.98, H, 4.71, N, 9.28.

**b)  $\text{R}_2\text{N} = \text{Et}_2\text{N}$ , **Mo5****

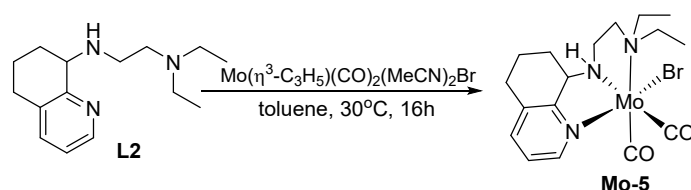

Using a similar procedure and molar ratios (**L2**, 247 mg, 1 mmol and  $\text{Mo}(\eta^3\text{-C}_3\text{H}_5)(\text{CO})_2(\text{MeCN})_2\text{Br}$ , 355 mg, 1 mmol) to that described for **Mo4**, **Mo5** was isolated as a pale-brown power (365 mg, 76%).

$^1\text{H}$  NMR (500 MHz, DMSO)  $\delta$  8.49 – 8.45 (m, 1H), 7.67 (d,  $J = 7.5$  Hz, 1H), 7.39 – 7.34 (m, 1H), 3.71 (d,  $J = 10.3$  Hz, 1H), 3.17 – 3.11 (m, 2H), 3.06 – 3.00 (m, 2H), 2.82 (s, 4H), 2.65 – 2.63 (m, 1H), 2.37 – 2.36 (m, 1H), 2.30 (s, 1H), 2.02 (s, 1H), 1.84 – 1.77 (m, 2H), 1.26 (s, 3H), 1.21 (d,  $J = 6.4$  Hz, 3H);  $^{13}\text{C}$  NMR (125 MHz, DMSO-*d*)  $\delta$  152.19, 147.01, 138.24, 138.16, 133.63, 123.92, 59.20, 57.03, 50.34, 46.97, 42.32, 27.71, 26.02, 20.36, 19.92; FT-IR ( $\text{cm}^{-1}$ , KBr): 1908 (s,  $\nu_{\text{CO}}$ ), 2025 (s,  $\nu_{\text{CO}}$ ), 3418 (m,  $\nu_{\text{NH}}$ ); Anal. Calcd for **Mo5** (479.26) [ $\text{C}_{17}\text{H}_{25}\text{BrMoN}_3\text{O}_2$ ]: C, 42.60; H, 5.26; N, 8.77; Found: C, 42.51, H, 5.30, N, 8.68.

**c)  $\text{R}_2\text{N} = i\text{-Pr}_2\text{N}$ , **Mo6****

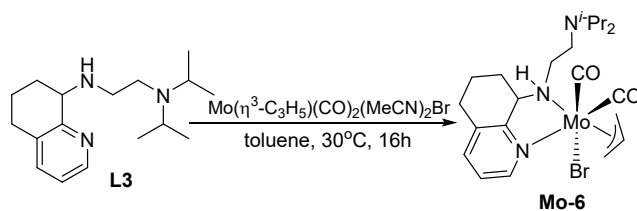

Using a similar procedure and molar ratios (**L3**, THQ- $\text{NNN}^{\text{Pr}_2}$ , 275 mg, 1 mmol and  $\text{Mo}(\eta^3\text{-C}_3\text{H}_5)(\text{CO})_2(\text{MeCN})_2\text{Br}$ , 355 mg, 1 mmol) to that described for **Mo4**, **Mo6** was isolated as a pale-brown power (410 mg, 74%).

$^1\text{H}$  NMR (500 MHz, DMSO-*d*)  $\delta$  8.38 (t,  $J = 52.4$  Hz, 1H), 7.74 (ddd,  $J = 28.5, 27.7, 7.7$  Hz, 1H), 7.53 – 7.32 (m, 1H), 4.40 (s, 1H), 3.76 (d,  $J = 49.5$  Hz, 2H), 3.31 (s, 6H), 3.07 (d,  $J = 45.4$  Hz, 2H), 2.78 (s, 2H), 2.00 (s, 1H), 1.83 – 1.63 (m, 2H), 1.35 (s, 2H), 1.21 – 1.16 (m, 1H), 1.12 – 0.92 (m, 12H);  $^{13}\text{C}$  NMR (125 MHz, DMSO-*d*)  $\delta$  155.70, 149.31, 139.44, 138.27, 134.70, 125.19, 124.26, 123.97, 65.38, 62.49, 56.81, 53.58, 48.55, 28.06, 27.82, 21.39, 20.78, 15.64; FT-IR ( $\text{cm}^{-1}$ , KBr): 1846 (s,  $\nu_{\text{CO}}$ ), 1930 (s,  $\nu_{\text{CO}}$ ), 3445 (m,  $\nu_{\text{NH}}$ ); Anal. Calcd for **Mo6** (551.41) [ $\text{C}_{22}\text{H}_{35}\text{BrMoN}_3\text{O}_2$ ]: C, 47.92; H, 6.76; N, 7.62; Found: C, 47.87, H, 6.81, N, 7.60.

**2.2.3 Synthesis of  $[\text{8}-(2\text{-R}_2\text{N/RS})\text{C}_2\text{H}_4\text{NHC}_9\text{H}_{10}\text{N}](\text{CO})\text{Mo}(\text{PPh}_3)_2$  (**Mo7** and **Mo8**)<sup>4</sup>**

**a)  $\text{R}_2\text{N} = \text{Me}_2\text{N}$ , **Mo7****

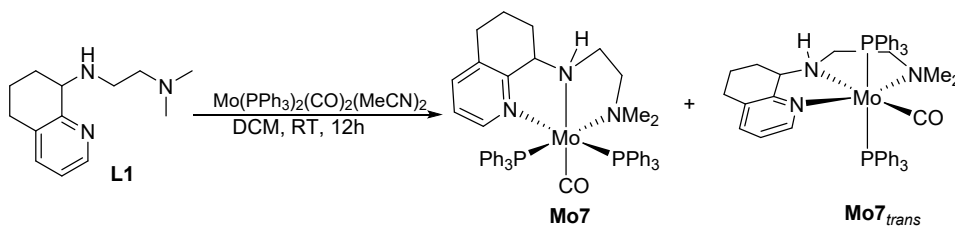

In a 25 mL Shrek bottle, a mixture of  $N^1,N^1$ -dimethyl- $N^2$ -(5,6,7,8-tetrahydroquinolin-8-yl)ethane-1,2-diamine (**L1**, 219 mg, 1 mmol) and  $\text{Mo}(\text{PPh}_3)_2(\text{CO})_2(\text{MeCN})_2$  (758 mg, 1 mmol) in 10 mL  $\text{CH}_2\text{Cl}_2$ . the reaction mixture was kept stirring at rt for 12 h. The solvent was concentrated to 2 mL in vacuo and ether (20 mL) was added until product precipitation occurred, the pale yellow solid was filtered and was washed two times with 5 mL of ether, and dried in vacuo to yield 462 mg (53%) of **Mo7/Mo7<sub>trans</sub>** as a pale-yellow powder.

The  $^{31}\text{P}\{^1\text{H}\}$  spectrum is recorded immediately following dissolution, the isomers: **Mo7**(84%) and **Mo7<sub>trans</sub>** (16%) were observed. On standing in deuterated DMSO for 12 h. the ratio of **Mo7/Mo7<sub>trans</sub>** changed to 80%: 20% by  $^{31}\text{P}\{^1\text{H}\}$  NMR spectroscopy.

$^1\text{H}$  NMR (500 MHz, DMSO)  $\delta$  8.72 (d,  $J = 5.1$  Hz, 1H), 7.82 (d,  $J = 7.7$  Hz, 1H), 7.65 – 7.60 (m, 18H), 7.56 (dd,  $J = 7.1, 3.0$  Hz, 12H), 7.48 – 7.46 (m, 1H), 6.43 (s, 1H), 4.25 – 4.18 (m, 1H), 2.86 (s, 3H), 2.83 – 2.80 (m, 2H), 2.16 (dd,  $J = 9.4, 2.9$  Hz, 2H), 2.07 (d,  $J = 12.4$  Hz, 2H), 2.00 – 1.96 (m, 1H), 1.90 (d,  $J = 11.8$  Hz, 1H), 1.80 – 1.71 (m, 2H), 1.66 (s, 3H);  $^{13}\text{C}$  NMR (100 MHz, DMSO- $d$ )  $\delta$  158.19, 157.22, 156.12, 149.69, 148.43, 146.91, 146.23, 143.02, 140.37, 137.90, 137.05, 135.81, 135.53, 135.17, 134.36, 134.25, 134.00, 132.98, 132.38, 132.36, 131.99, 131.90, 130.85, 130.72, 129.18, 129.07, 128.92, 128.81, 126.16, 123.86, 122.60, 122.20, 60.87, 58.36, 53.63, 49.89, 45.65, 27.60, 25.77, 21.13, 19.47;  $^{31}\text{P}$  NMR (202 MHz, DMSO- $d$ )  $\delta$  25.67, 17.44(*trans*); FT-IR ( $\text{cm}^{-1}$ , KBr): 1886 (s,  $\nu_{\text{CO}}$ ), 3424 (m,  $\nu_{\text{NH}}$ ); Anal. Calcd for **Mo7** (867.88) [ $\text{C}_{50}\text{H}_{51}\text{MoN}_3\text{OP}_2$ ]: C, 69.20; H, 5.92; N, 4.84; Found: C, 69.16, H, 5.98, N, 4.76.

**b) RS = EtS, Mo8**

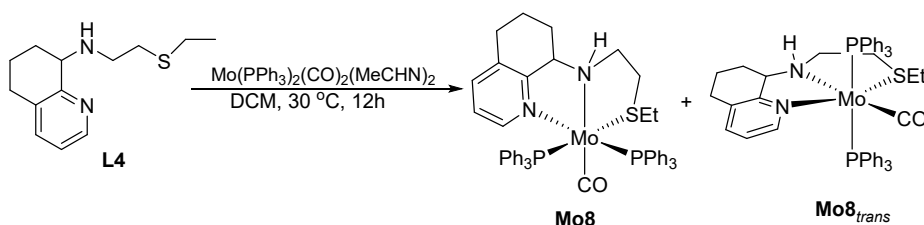

Using a similar procedure and molar ratios (**L4**, 222 mg, 1 mmol and  $\text{Mo}(\text{PPh}_3)_2(\text{CO})_2(\text{MeCN})_2$  758 mg, 1 mmol) to that described for **Mo7**, **Mo8/Mo8<sub>trans</sub>** was isolated as a pale-brown powder (546 mg, 67%)

The  $^{31}\text{P}\{^1\text{H}\}$  spectrum is recorded immediately following dissolution, the isomers **Mo8**(55%) and **Mo8<sub>trans</sub>** (45%) were observed.

$^1\text{H}$  NMR (500 MHz, DMSO)  $\delta$  8.45 (s, 1H), 8.11 (s, 1H), 7.95 – 7.88 (m, 3H), 7.84 – 7.76 (m, 5H), 7.75 – 7.69 (m, 4H), 7.62 (dd,  $J = 11.7, 7.1$  Hz, 5H), 7.58 – 7.52 (m, 3H), 7.48 (d,  $J = 3.2$  Hz, 6H), 7.44 (d,  $J = 5.2$  Hz, 2H), 7.31 (s, 2H), 7.20 – 7.16 (m, 1H), 3.03 – 3.01 (m, 1H), 2.79 (s, 4H), 2.56 (d,  $J = 7.3$  Hz, 2H), 2.16 (d,  $J = 6.2$  Hz, 2H), 2.01 (s, 2H), 1.75 (s, 2H), 1.21 (s, 3H);  $^{13}\text{C}$  NMR (100 MHz, DMSO- $d$ )  $\delta$  203.98 (C=O), 151.88, 147.09, 144.41, 139.34, 138.30, 138.11, 137.44, 137.32, 135.49, 134.36, 134.25, 134.06, 133.80, 133.60, 133.04, 132.92, 132.80, 132.35, 132.33, 131.99, 131.89, 130.84, 130.71, 129.43, 129.34, 129.16, 129.09, 129.05, 128.79, 124.07, 123.95, 56.93, 47.22, 45.12, 34.88, 32.69, 27.71, 25.44, 19.82, 15.10;  $^{31}\text{P}$  NMR (202 MHz, DMSO- $d$ )  $\delta$  50.65, 17.36 (*trans*); FT-IR ( $\text{cm}^{-1}$ , KBr): 1888 (s,  $\nu_{\text{CO}}$ ), 3425 (m,  $\nu_{\text{NH}}$ ); Anal. Calcd for **Mo8** (807.81) [ $\text{C}_{44}\text{H}_{45}\text{MoN}_2\text{OP}_2\text{S}$ ]: C, 65.42; H, 5.62; N, 3.47; Found: C, 65.48, H, 5.68, N, 3.46.

### 3 NMR and IR spectra for molybdenum complexes

#### 3.1 $^1\text{H}$ , $^{13}\text{C}$ and $^{31}\text{P}$ NMR spectra for molybdenum complexes

Figure S1 The  $^1\text{H}$  and  $^{13}\text{C}$  NMR spectra for Mo1 in  $\text{DMSO-}d_6$

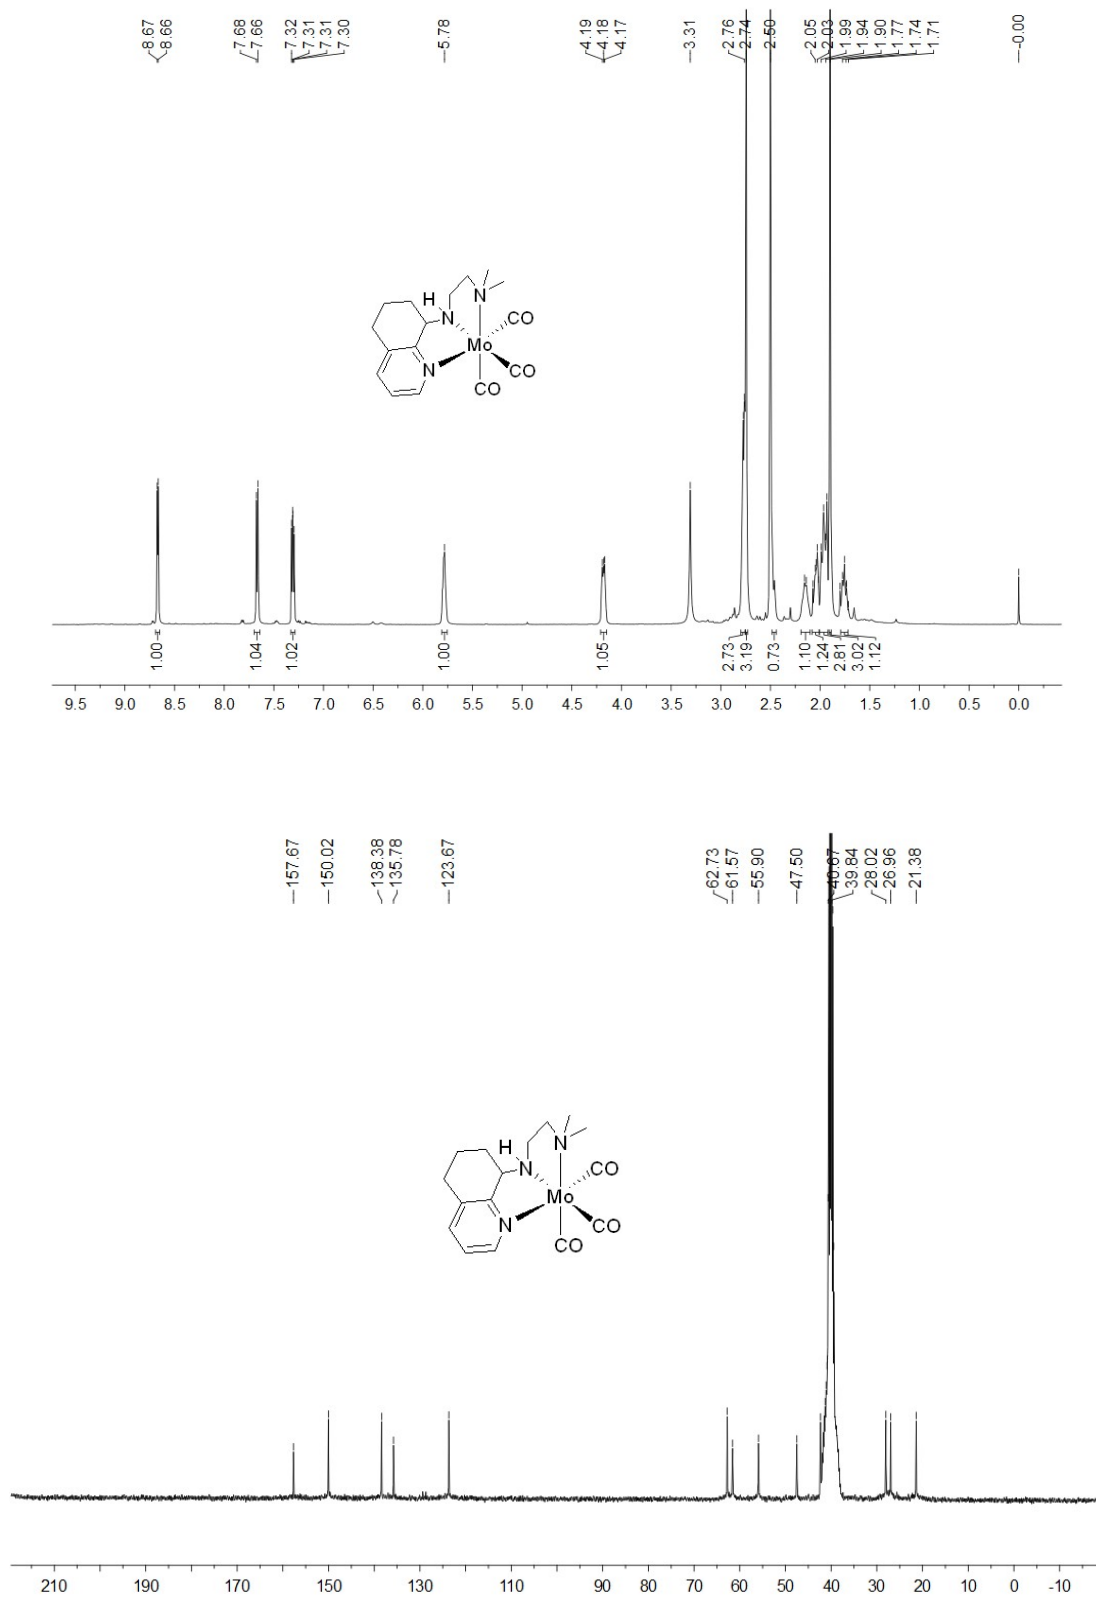

**Figure S2** The  $^1\text{H}$  and  $^{13}\text{C}$  NMR spectra for **Mo2** in  $\text{DMSO-}d$

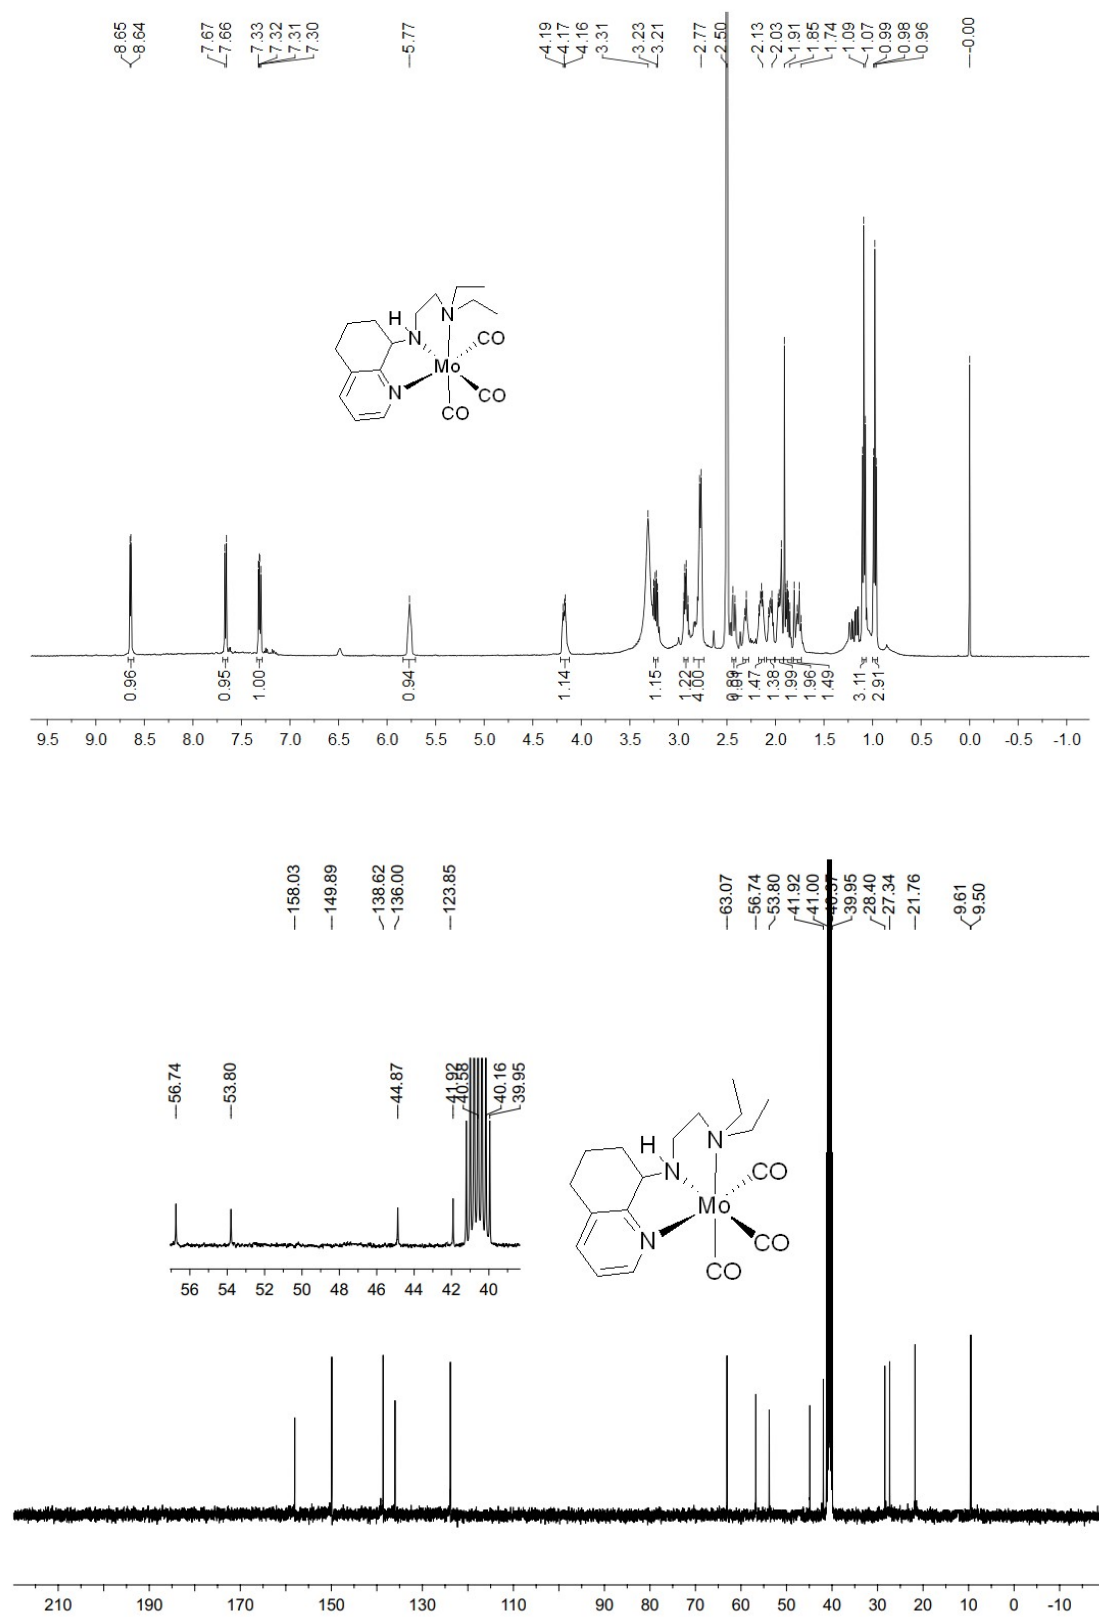



Figure S3 The  $^1\text{H}$  and  $^{13}\text{C}$  NMR spectra for **Mo3** in  $\text{DMSO-}d$

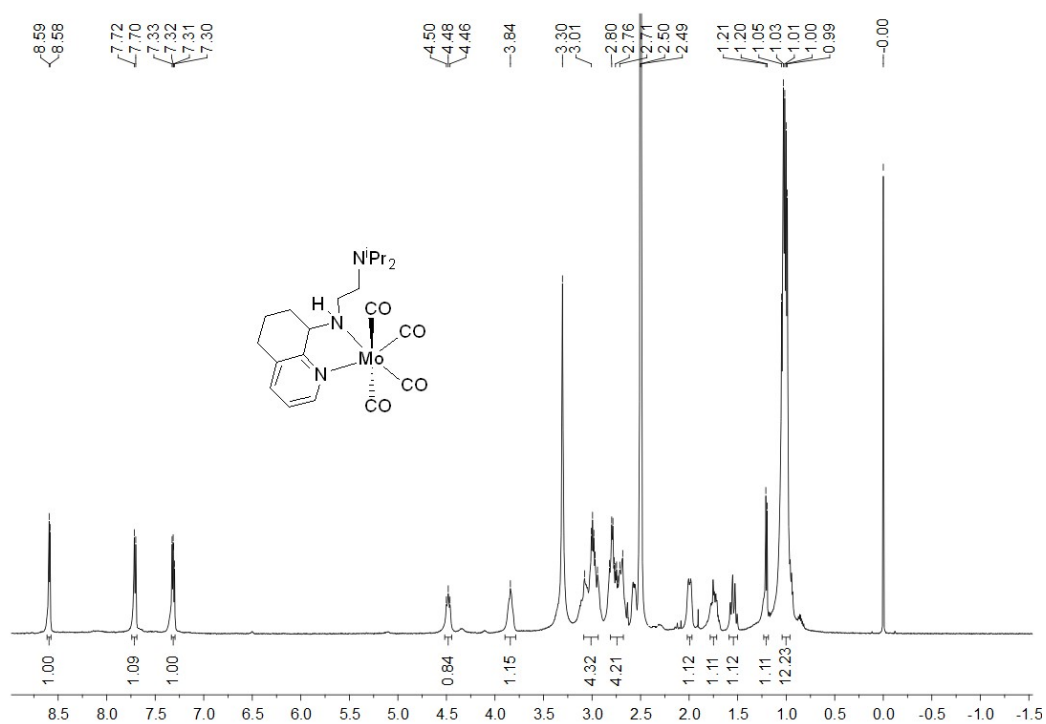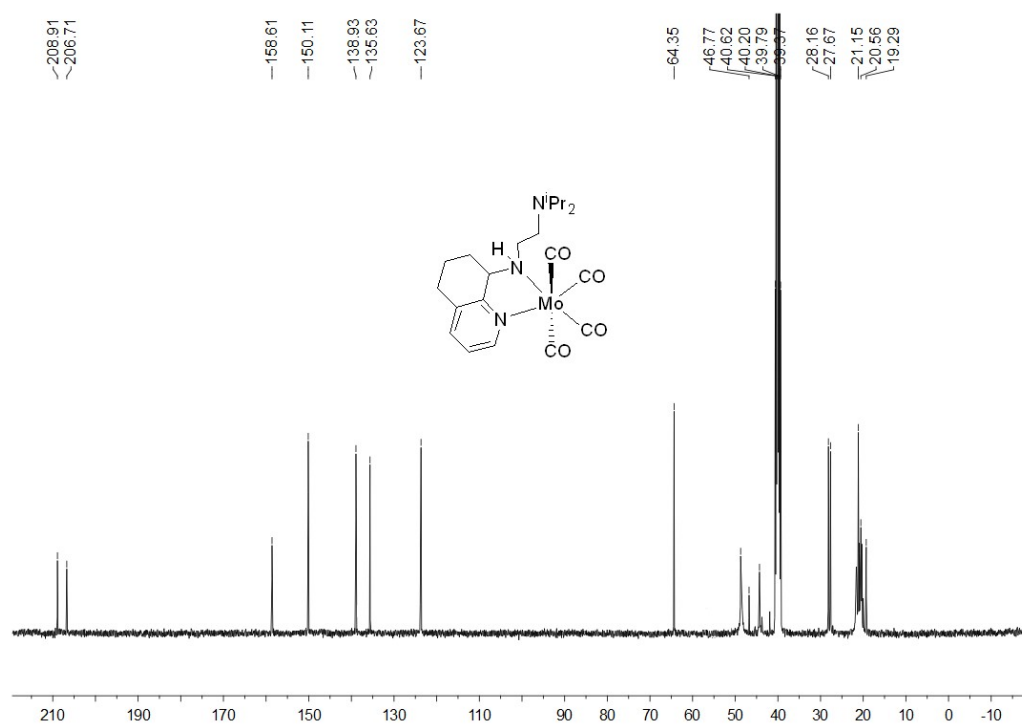

Figure S4 The  $^1\text{H}$  and  $^{13}\text{C}$  NMR spectra for Mo4 in  $\text{DMSO-}d$  at  $80\text{ }^\circ\text{C}$

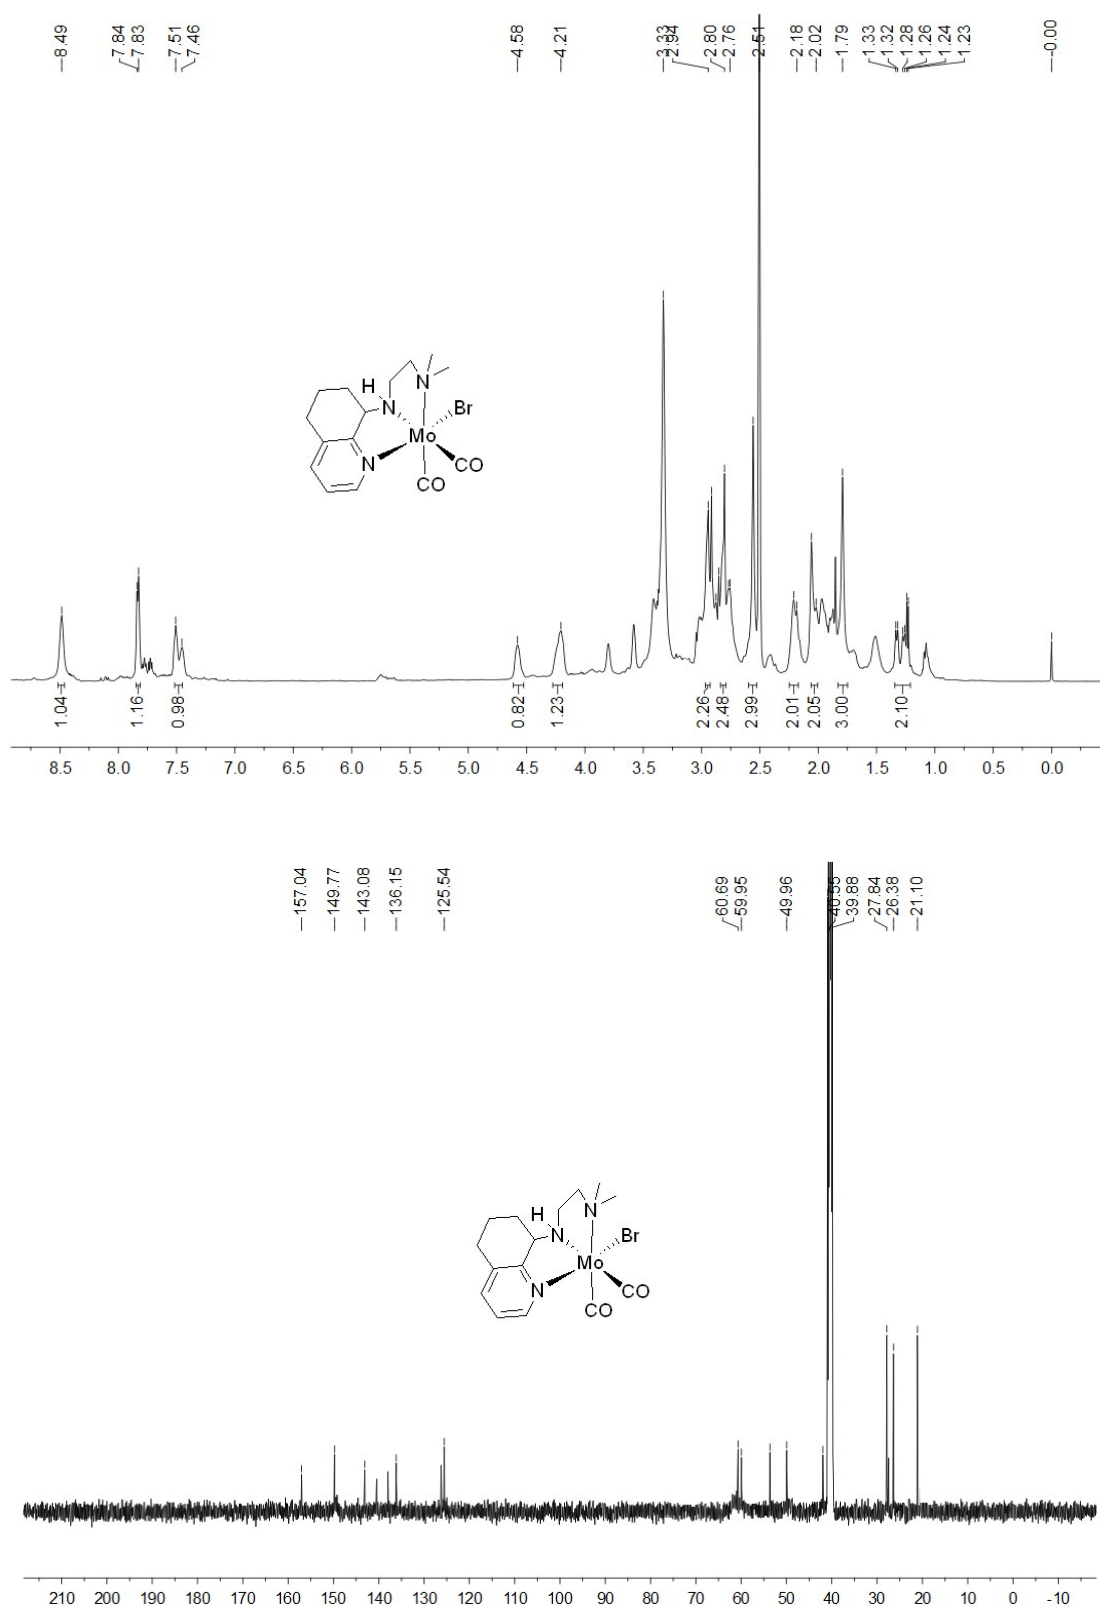

Figure S5 The  $^1\text{H}$  and  $^{13}\text{C}$  NMR spectra for Mo5 in  $\text{DMSO-}d$  at  $80\text{ }^\circ\text{C}$

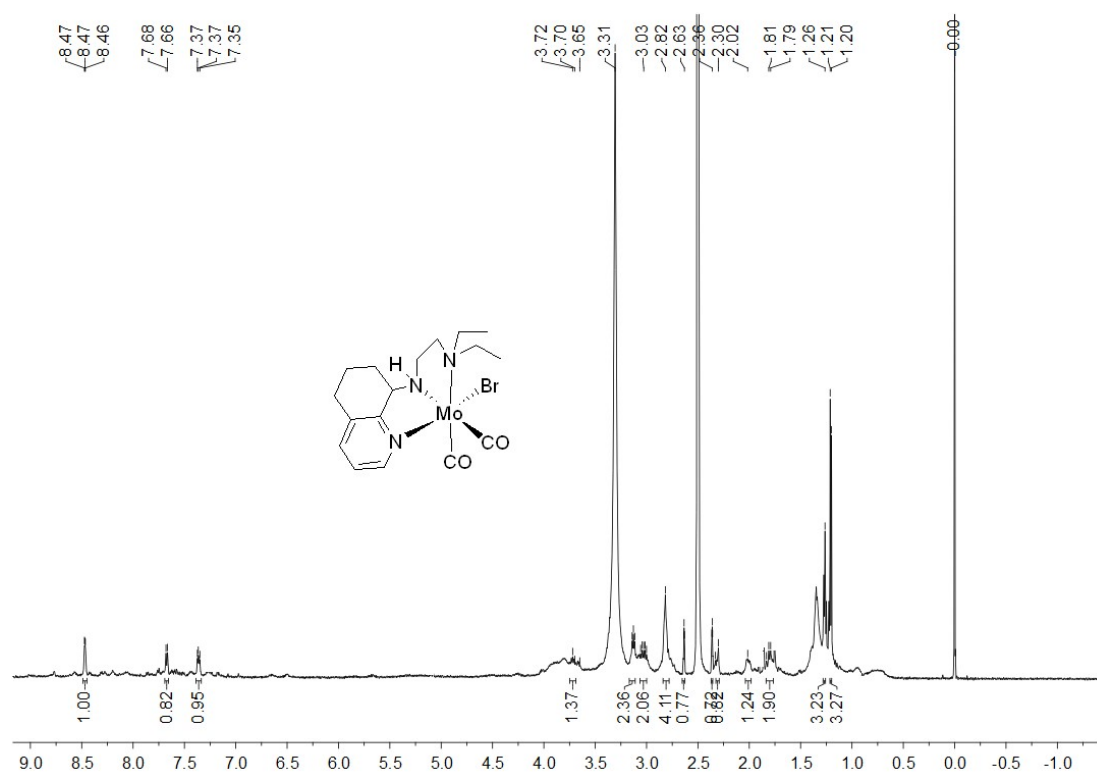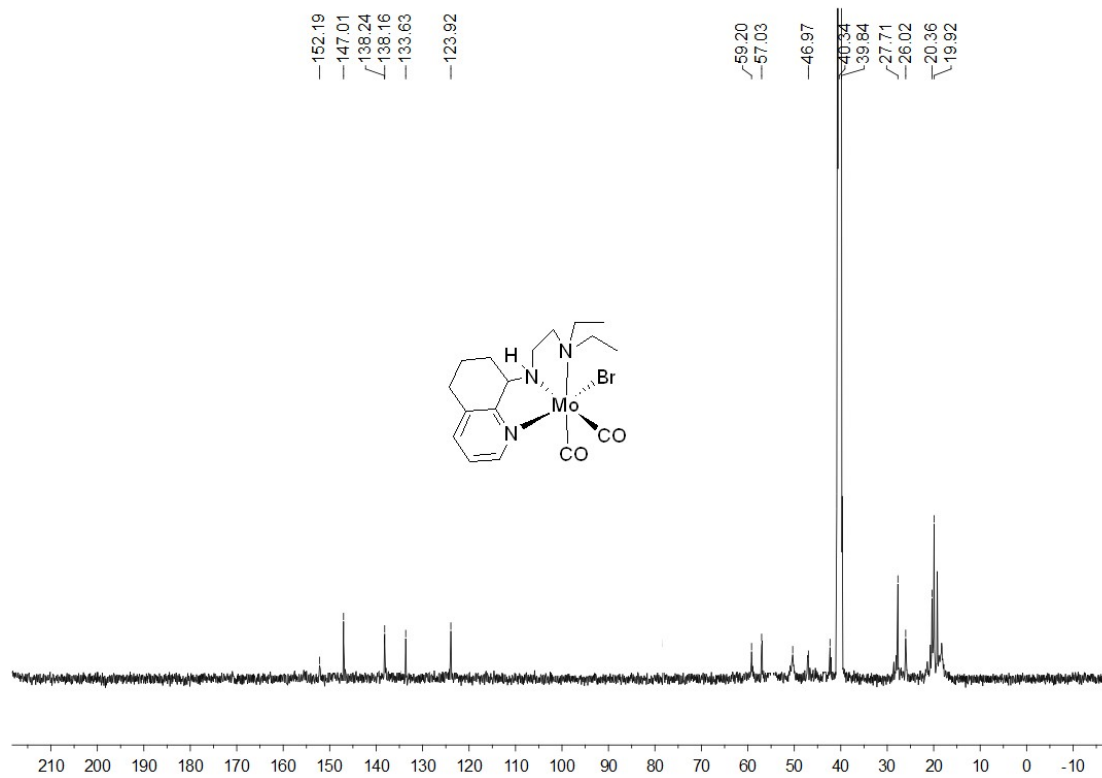

Figure S6 The  $^1\text{H}$  and  $^{13}\text{C}$  NMR spectra for Mo6 in  $\text{DMSO-}d$

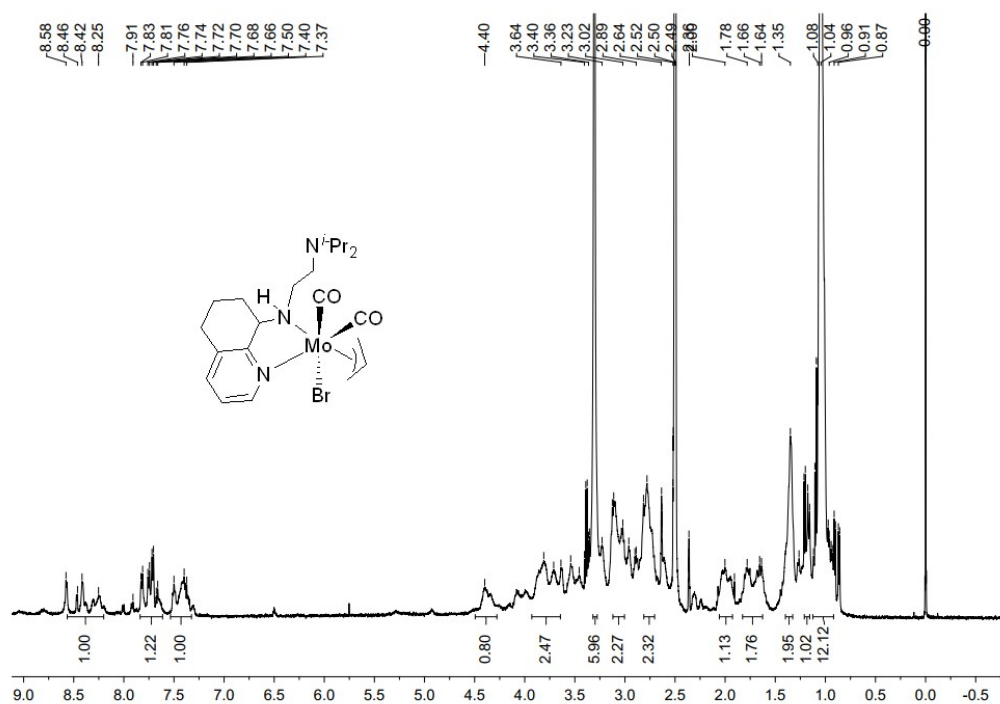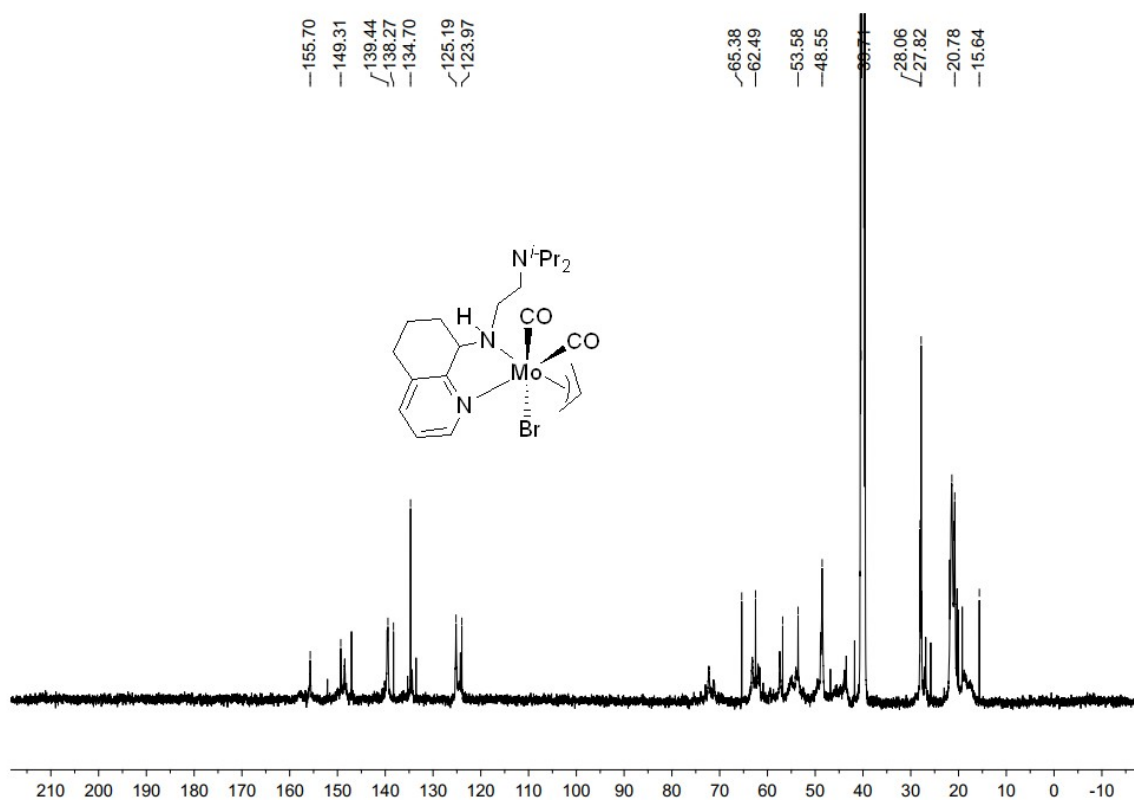

Figure S7 The  $^1\text{H}$ ,  $^{13}\text{C}$  and  $^{31}\text{P}$  NMR spectra for Mo7 and Mo7<sub>trans</sub> in DMSO-d

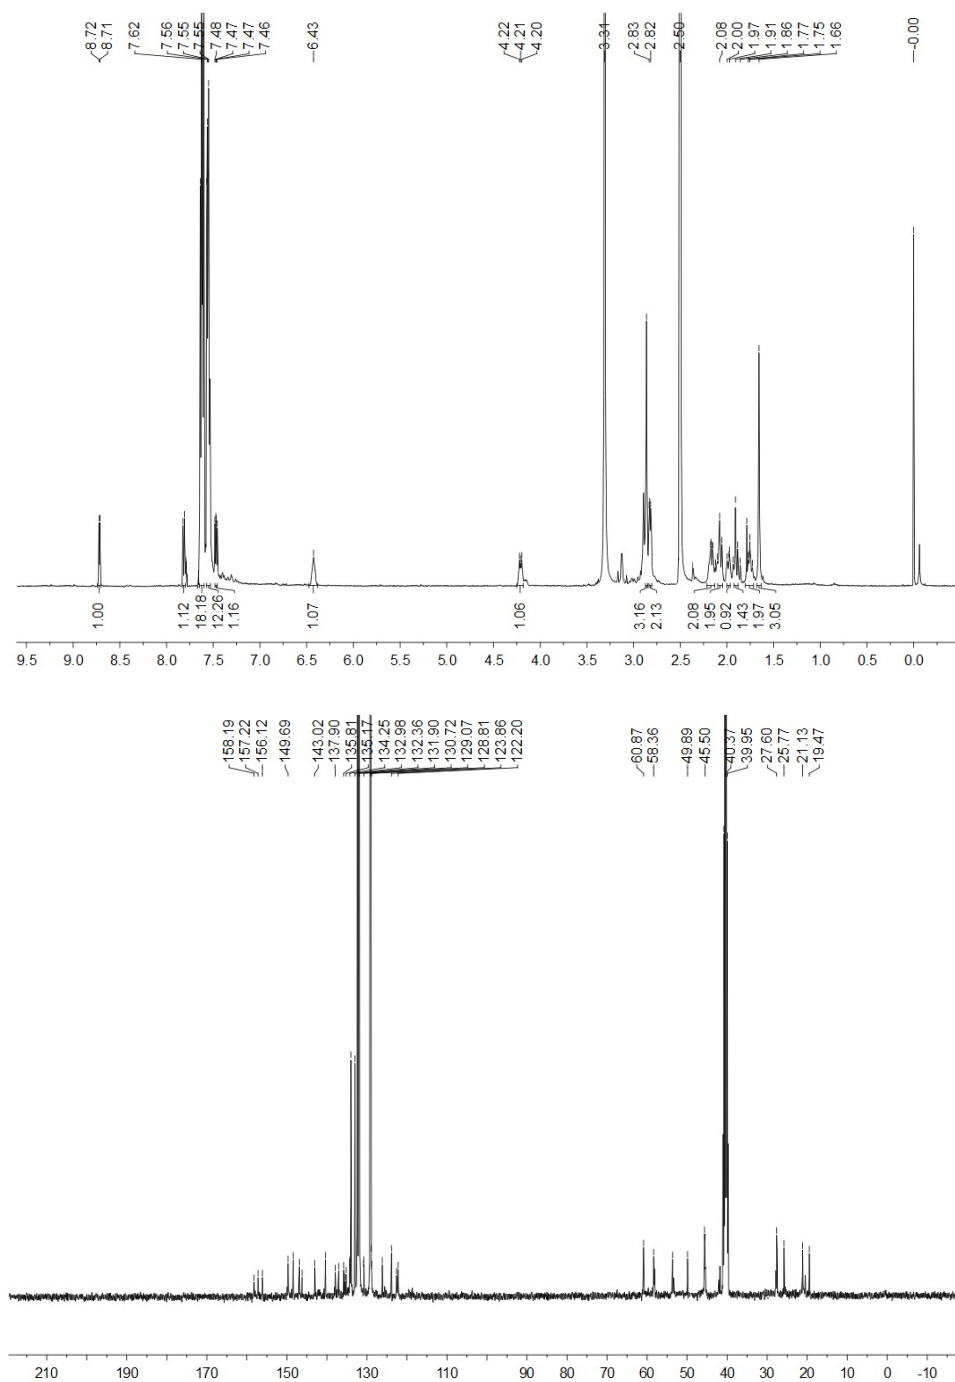

Figure S8 The  $^{31}\text{P}\{^1\text{H}\}$  NMR spectrum of **Mo7**/**Mo7<sub>trans</sub>** in  $\text{DMSO-}d_6$ , spectrum recorded following dissolution

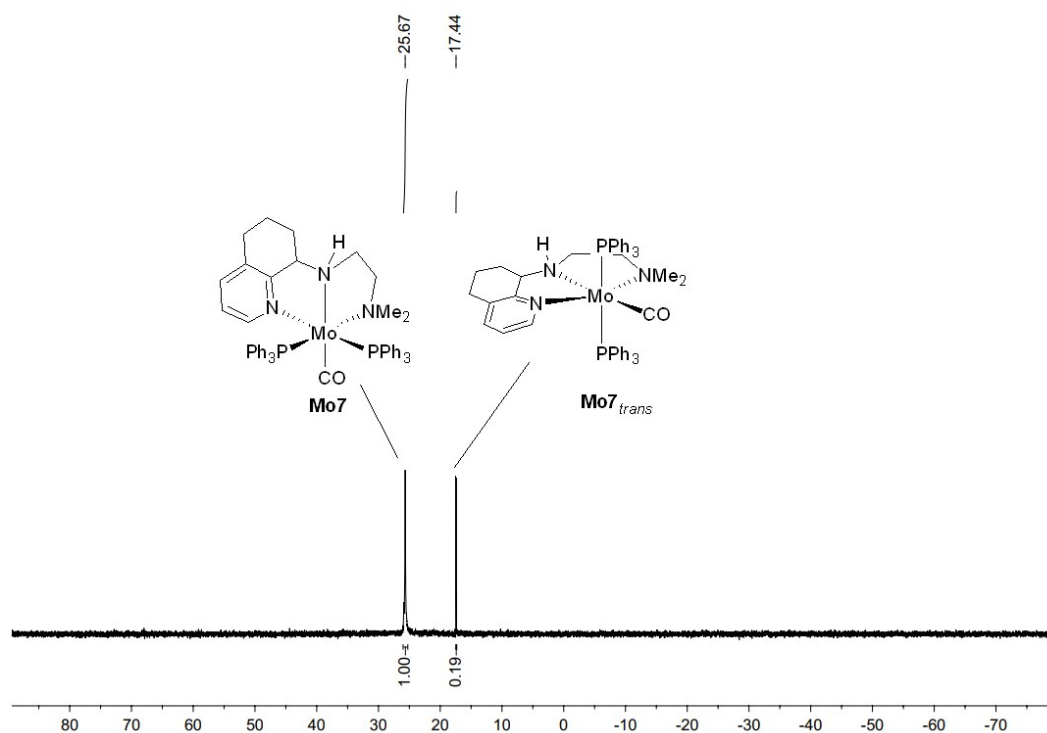

$^{31}\text{P}\{^1\text{H}\}$  NMR (202 MHz,  $\text{DMSO-}d_6$ ) spectrum recorded following dissolution (ratio of **Mo7**/**Mo7<sub>trans</sub>** = 84:16)

Figure S9 The  $^{31}\text{P}\{^1\text{H}\}$  NMR spectrum of **Mo7**/**Mo7<sub>trans</sub>** in  $\text{DMSO-}d_6$ ; spectrum recorded after standing in  $\text{DMSO-}d_6$  for 8 h

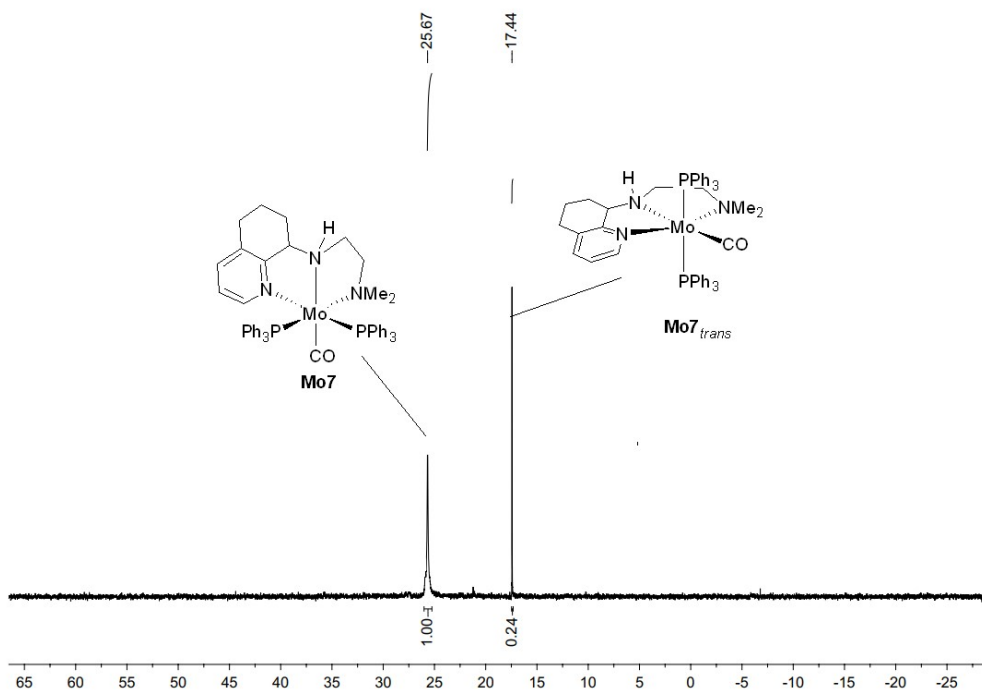

$^{31}\text{P}\{^1\text{H}\}$  NMR (202 MHz,  $\text{DMSO-}d_6$ ) spectrum recorded after standing in  $\text{DMSO-}d_6$  for 12 hours (ratio of **Mo7**/**Mo7<sub>trans</sub>** = 80:20)

Figure S10 The  $^1\text{H}$ ,  $^{13}\text{C}$  and  $^{31}\text{P}$  NMR spectra for Mo8/Mo8<sub>trans</sub> in DMSO-*d*

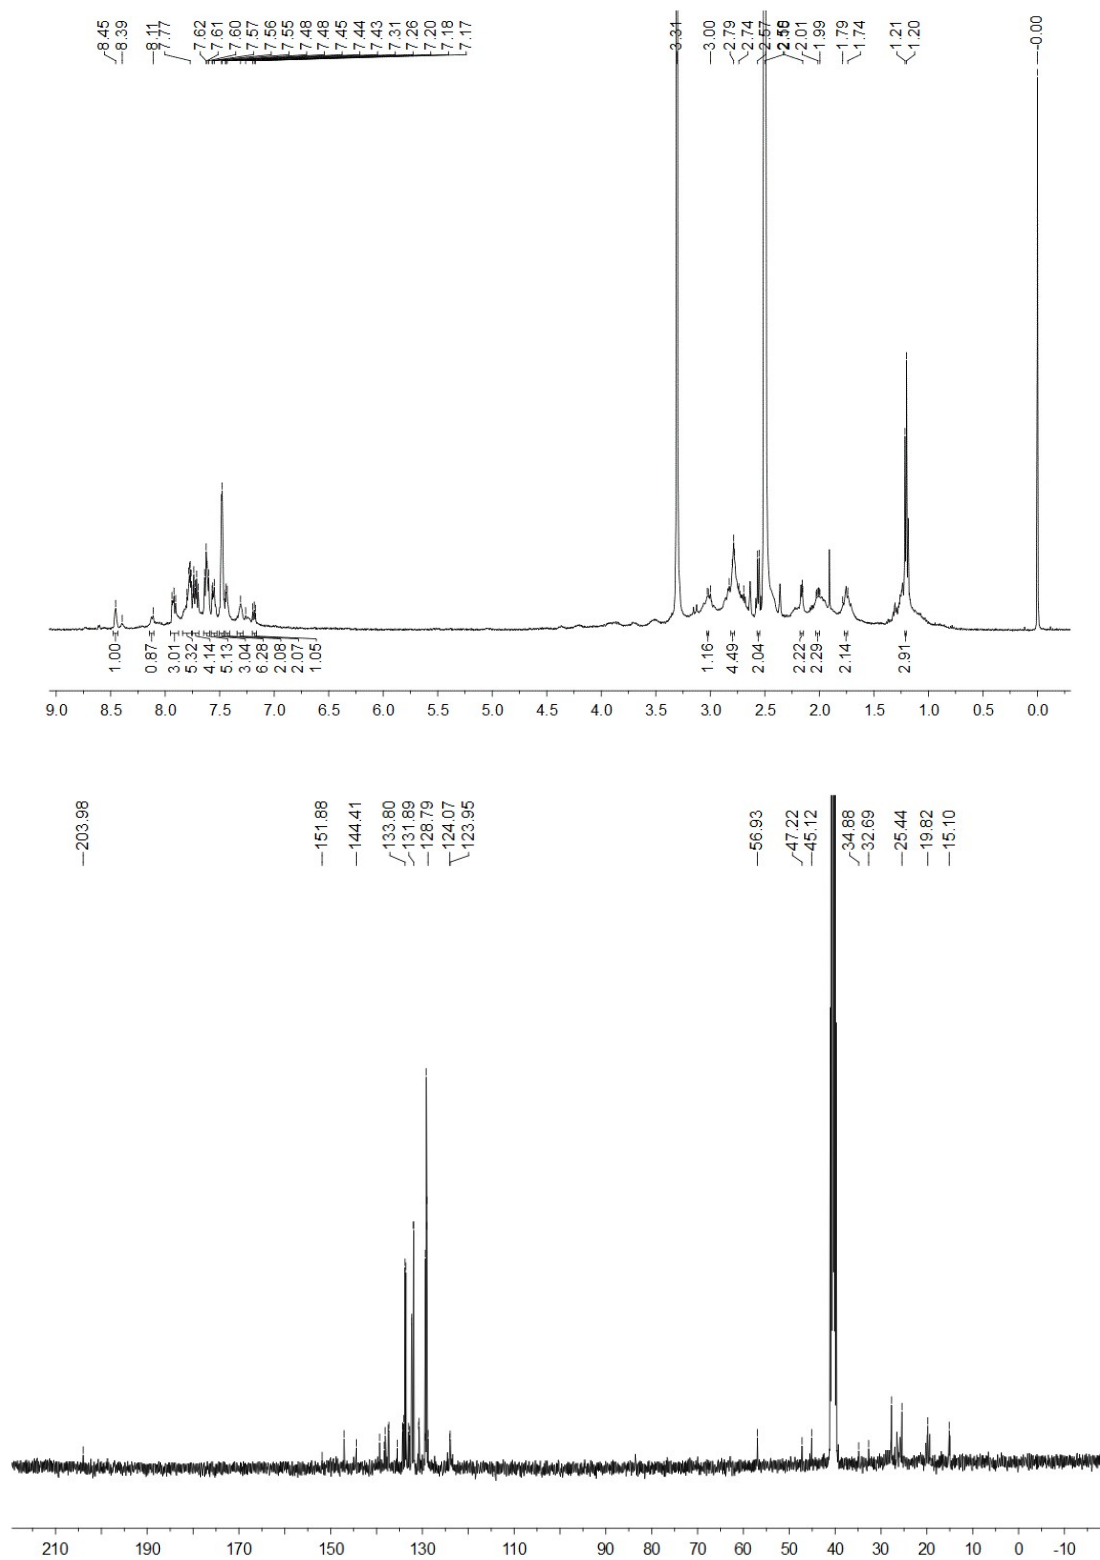

Figure S11 The  $^{31}\text{P}\{^1\text{H}\}$  NMR spectrum of **Mo8**/**Mo8<sub>trans</sub>** in  $\text{DMSO-}d_6$ ; spectrum recorded following dissolution

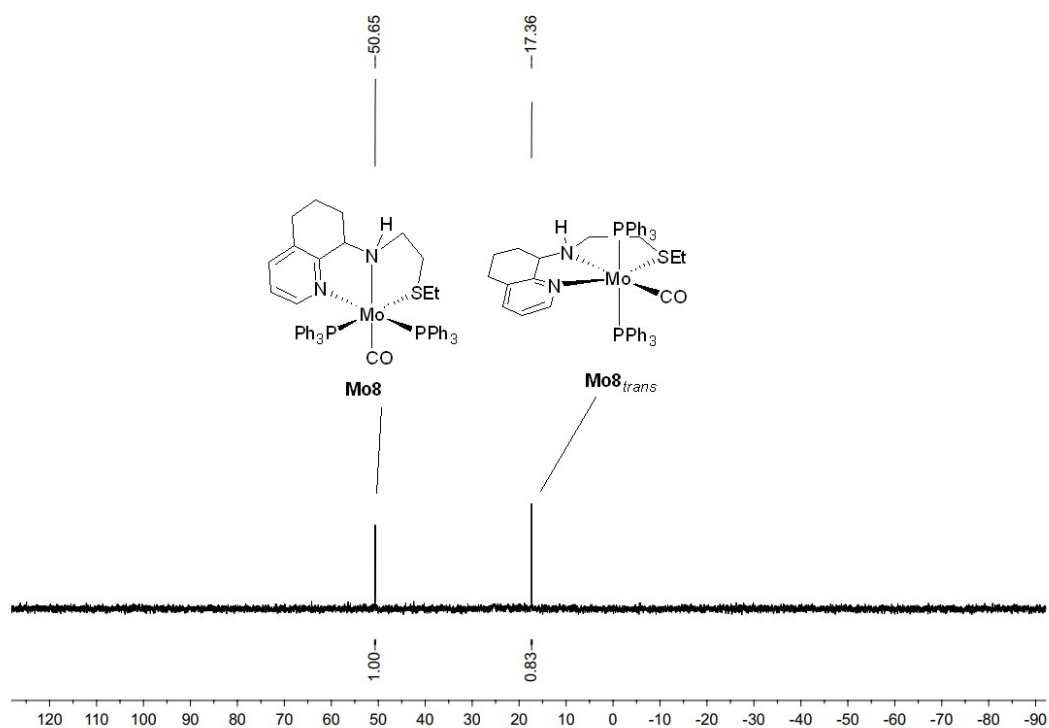

$^{31}\text{P}\{^1\text{H}\}$  NMR (202 MHz,  $\text{DMSO-}d_6$ ) spectrum recorded following dissolution (ratio of **Mo8**/**Mo8<sub>trans</sub>** = 55:45)

### 3.2 IR spectra for molybdenum complexes

Figure S12 FT-IR spectrum for **Mo1**

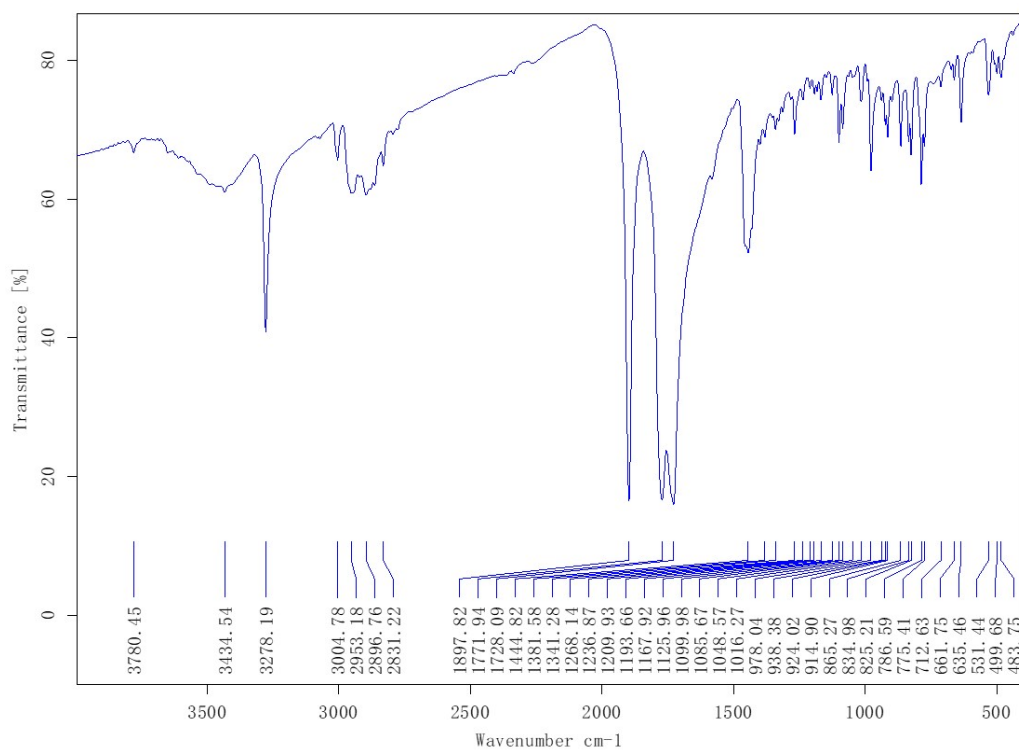



**Figure S13** IR spectrum for **Mo2**

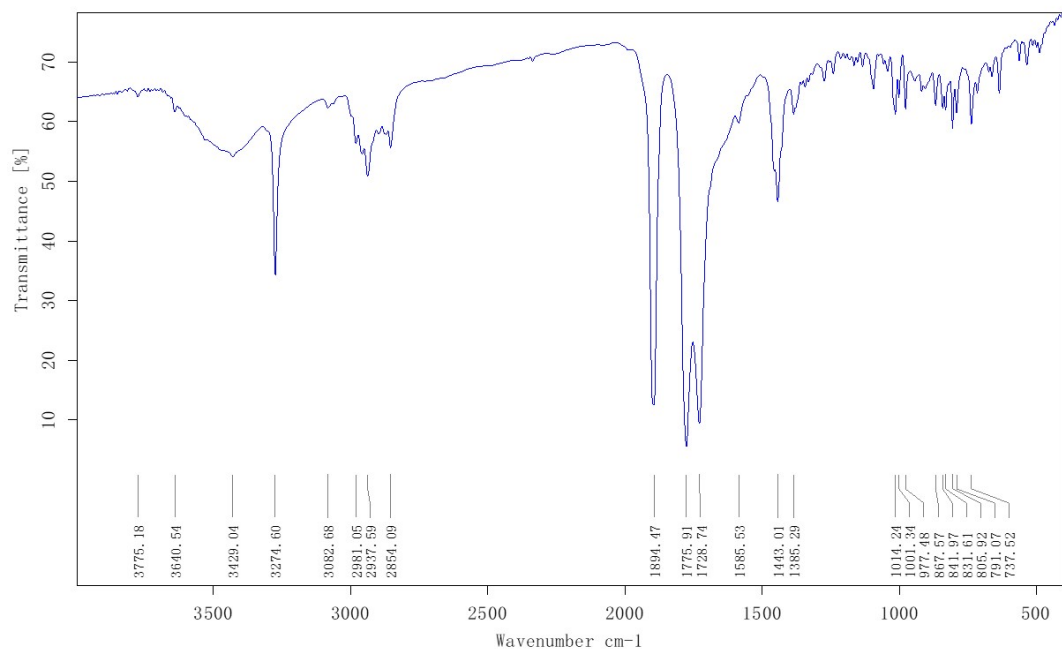

**Figure S14** IR spectrum for **Mo3**

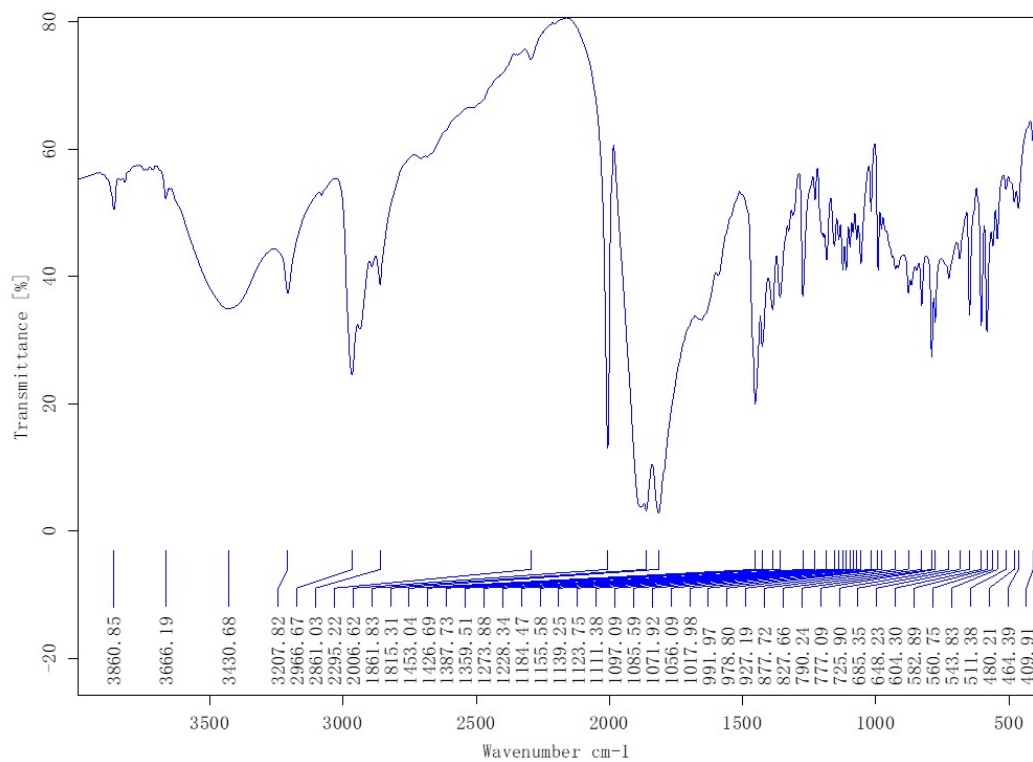

**Figure S15** IR spectrum for **Mo4**

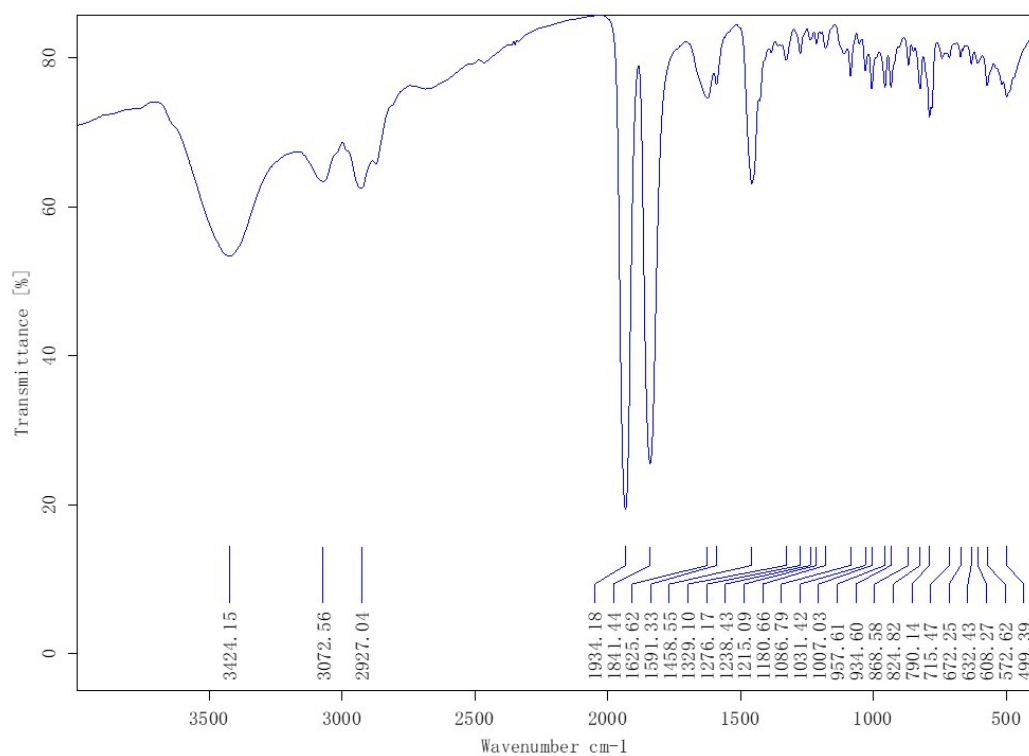

**Figure S16** IR spectrum for **Mo5**

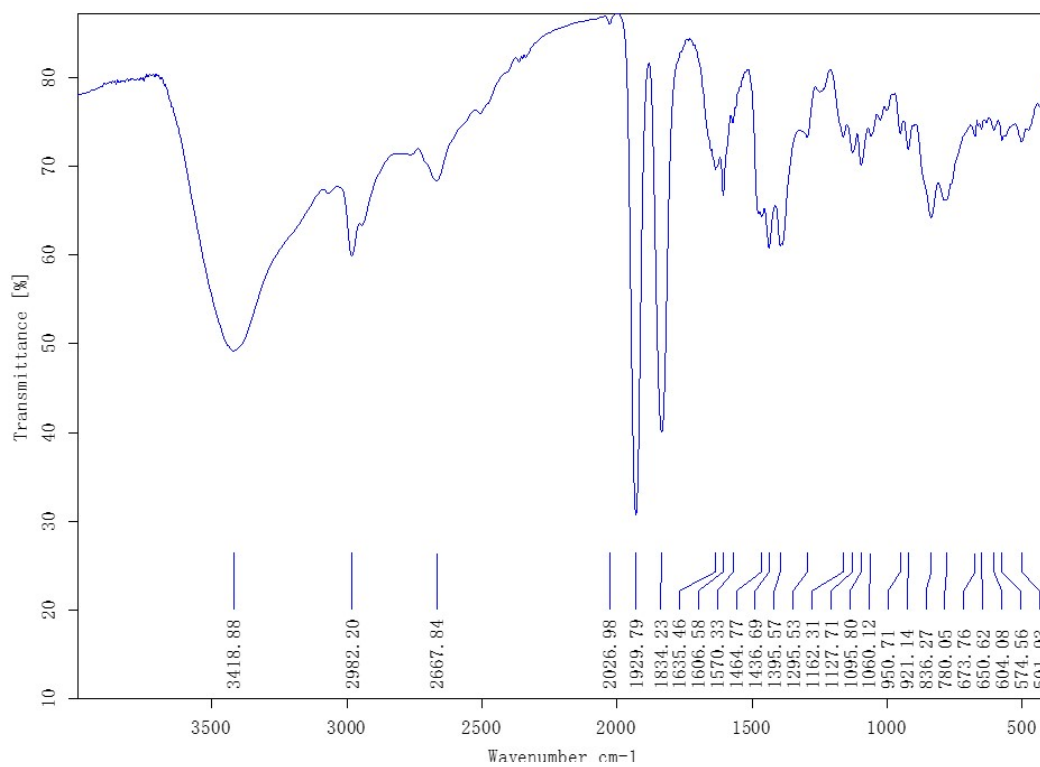

**Figure S17** IR spectrum for **Mo6**

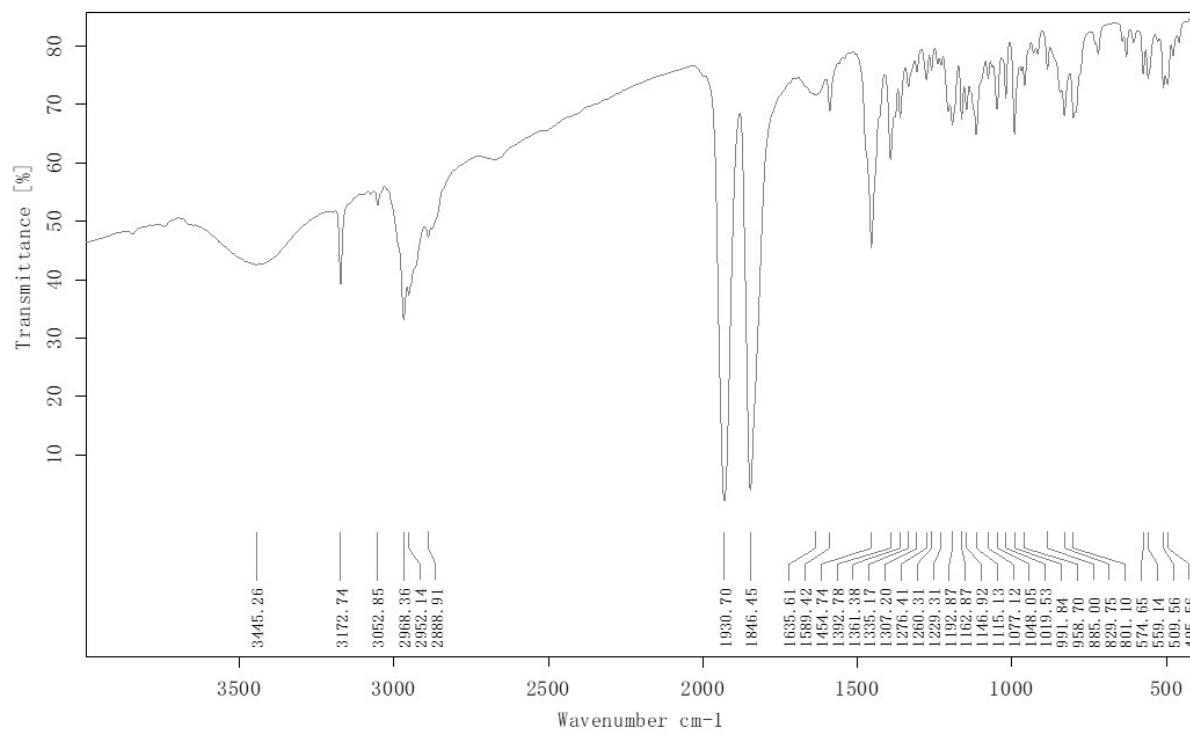

**Figure S18** IR spectrum for **Mo7/Mo7<sub>trans</sub>**

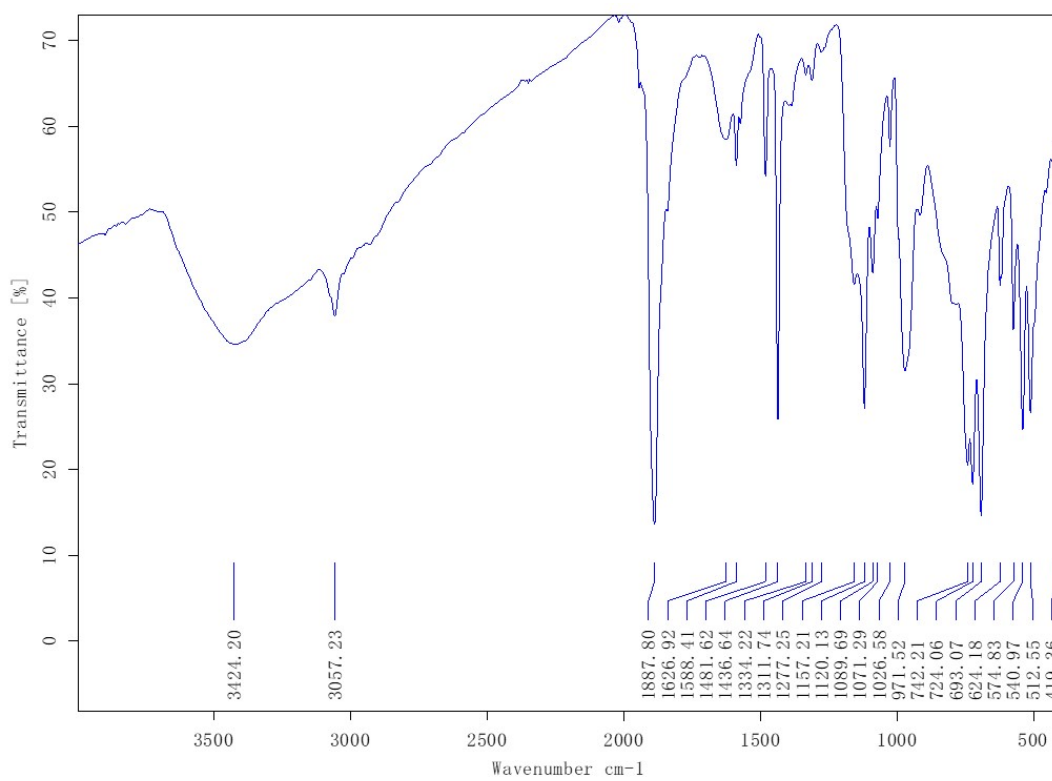

Figure S18 IR spectrum for **Mo8/ Mo8<sub>trans</sub>**

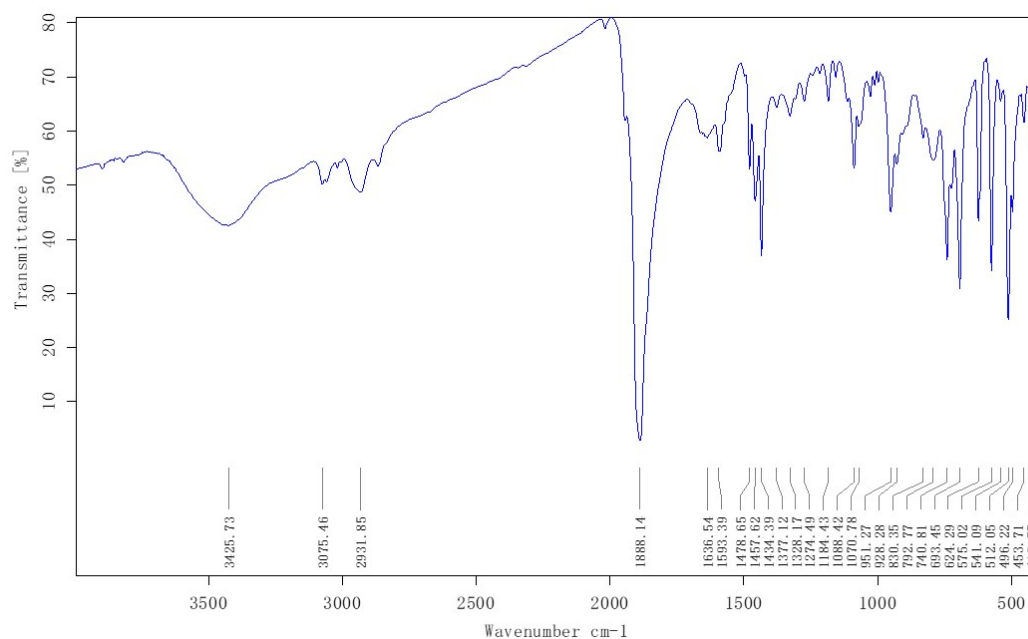

#### 4. Catalytic study

Under nitrogen, a 25 mL dried Schlenk tube was charged with selected ketonic substrate (2.5 mmol), molybdenum complex (**Mo6**, 10  $\mu$ mol), NaHBET<sub>3</sub> (0.1 mmol), the desired amount of base (NaOH) (2.5 mmol) and dry and degassed 2-propanol (5 mL). The mixture was put to the desired temperature of bath (oil temperature, 20 – 110 °C) and the contents stirred. After 2 h, the mixture was cooled to room temperature, and the pressure slowly released. The reaction mixture was filtered through a plug of silica gel and then analyzed by GC, the composition of the reaction mixture was confirmed by running GC on a mixture of pure ketone, alcohol and dodecane. All yields and conversions were determined by GC using dodecane as internal standard (Table S2).

**Table S2** Transfer hydrogenation of acetophenone to 1-phenylethanol using **Mo-6** at different temperature<sup>a</sup>

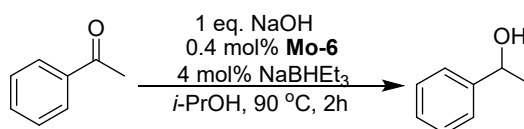

| Entry | T(°C) | t(h) | Conv.% <sup>b</sup> |
|-------|-------|------|---------------------|
| 1     | 20    | 2    | 5                   |
| 2     | 30    | 2    | 16                  |
| 3     | 60    | 2    | 28                  |
| 4     | 90    | 2    | 95                  |
| 5     | 110   | 2    | 96                  |

<sup>a</sup>Conditions: 2.5 mmol acetophenone, 10  $\mu$ mol (0.4 mol%) **Mo6**, 2.5 mmol (1 eq.) NaOH, 0.1 mmol NaBHET<sub>3</sub> (4 mol%), 5 mL *i*-PrOH, 30 ~ 110 °C (oil temperature), 2 hours, 1 atm N<sub>2</sub>; <sup>b</sup> Determined by GC with dodecane as the internal standard.

**Table S3** Transfer hydrogenation of acetophenone to 1-phenylethanol using **Mo1** ~ **Mo9** over different run time.<sup>a</sup>

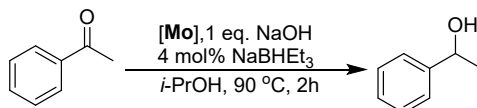

| Entry | [Mo]       | t(h) | Conv.% <sup>b</sup> |
|-------|------------|------|---------------------|------|---------------------|------|---------------------|------|---------------------|
| 1     | <b>Mo1</b> | 0.5  | 15                  | 1.0  | 46                  | 1.5  | 62                  | 2.0  | 88                  |
| 2     | <b>Mo2</b> | 0.5  | 12                  | 1.0  | 39                  | 1.5  | 58                  | 2.0  | 75                  |
| 3     | <b>Mo3</b> | 0.5  | 17                  | 1.0  | 48                  | 1.5  | 72                  | 2.0  | 89                  |
| 4     | <b>Mo4</b> | 0.5  | 38                  | 1.0  | 71                  | 1.5  | 85                  | 2.0  | 92                  |
| 5     | <b>Mo5</b> | 0.5  | 35                  | 1.0  | 57                  | 1.5  | 78                  | 2.0  | 85                  |
| 6     | <b>Mo6</b> | 0.5  | 48                  | 1.0  | 75                  | 1.5  | 92                  | 2.0  | 95                  |
| 7     | <b>Mo7</b> | 0.5  | 28                  | 1.0  | 62                  | 1.5  | 82                  | 2.0  | 91                  |
| 8     | <b>Mo8</b> | 0.5  | 24                  | 1.0  | 54                  | 1.5  | 75                  | 2.0  | 82                  |

<sup>a</sup> Conditions: 2.5 mmol acetophenone, 10  $\mu$ mol (0.4 mol%) molybdenum complex (**Mo1** – **Mo8**), 10 mg (2.5 mmol, 1 eq.) NaOH, 0.1 mmol (4 mol%) NaBHET<sub>3</sub>, 5 mL *i*-PrOH, 90 °C (oil temperature), 0.5 - 2 h, 1 atm N<sub>2</sub>; <sup>b</sup>Determined by GC with dodecane as the internal standard.

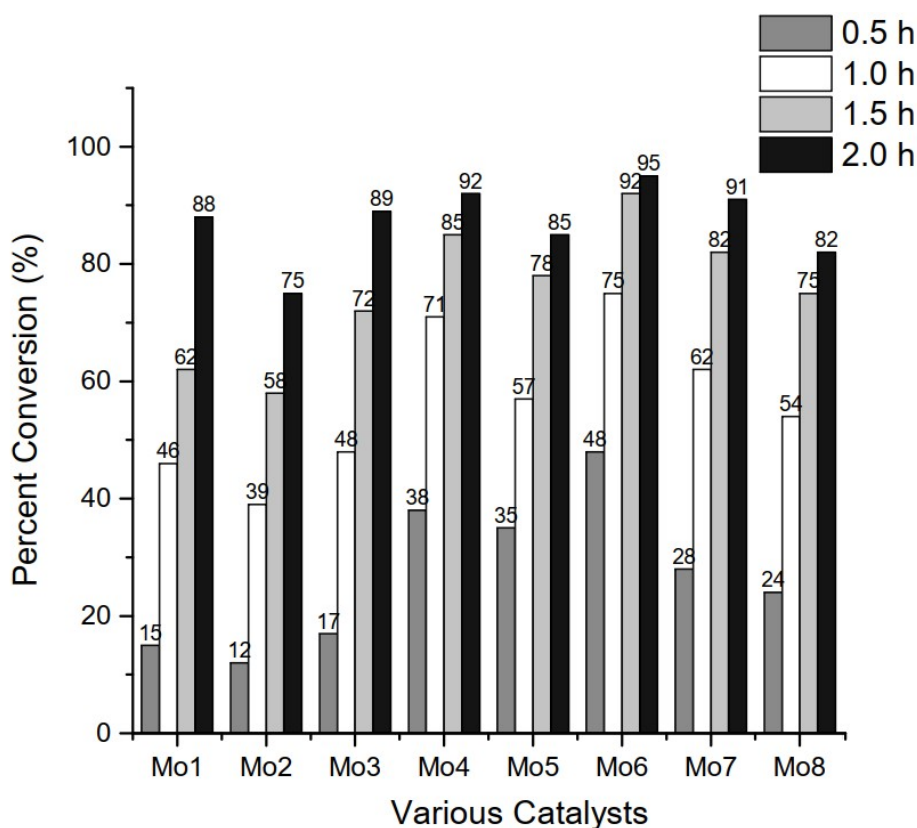

**Figure S19** Comparison of molybdenum catalysts for transfer hydrogenation of acetophenone under the conditions in Table S3

## 5. Characterization of selected alcohol products

The reaction mixture was purified by flash gel chromatography (eluent: petroleum ether / ethyl acetate = 200:1 to 50:1) to give the desired product.

### 5.1. <sup>1</sup>H and <sup>13</sup>C NMR of the selected alcohol products

#### 5.1.1 1-phenylethanol (entry 6, Table 1)

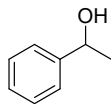

89% yield, colorless oil, <sup>1</sup>H NMR (400 MHz, CDCl<sub>3</sub>) δ 7.44 -7.30 (m, 5H), 4.90 (q, *J* = 6.4 Hz, 1H), 2.60 (brs, 1H), 1.54 (d, *J* = 6.4 Hz, 3H); <sup>13</sup>C NMR (100 MHz, CDCl<sub>3</sub>) δ 145.93, 128.51, 127.52, 125.47, 70.32, 25.23.

#### 5.1.2 1-(4-fluorophenyl)ethan-1-ol (entry 3, Table 4)

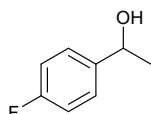

90% yield, colorless oil, <sup>1</sup>H NMR (400 MHz, CDCl<sub>3</sub>) δ 7.39-7.35 (m, 2H), 7.10-7.04 (m, 2H), 4.92 (q, *J* = 6.4 Hz, 1H), 1.92 (s, 1H), 1.52 (d, *J* = 6.4 Hz, 3H); <sup>13</sup>C NMR (100 MHz, CDCl<sub>3</sub>) δ 162.1, 141.5, 127.1, 115.3, 69.78, 25.30.

#### 5.1.3 1-(4-chlorophenyl)ethan-1-ol (entry 4, Table 4)

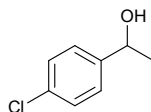

87% yield, colorless oil, <sup>1</sup>H NMR (400 MHz, CDCl<sub>3</sub>) δ 7.35-7.31 (m, 4H), 4.91 (q, *J* = 6.4 Hz, 1H), 2.04 (s, 1H), 1.51 (d, *J* = 6.4 Hz, 3H); <sup>13</sup>C NMR (100 MHz, CDCl<sub>3</sub>) δ 144.27, 133.08, 128.63, 126.83, 69.78, 25.30.

#### 5.1.4 1-(4-bromophenyl)ethan-1-ol (entry 5, Table 4)

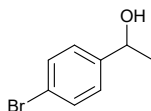

88% yield, colorless oil, <sup>1</sup>H NMR (400 MHz, CDCl<sub>3</sub>) δ 7.50-7.47 (m, 2H), 7.29-7.25 (m, 2H), 4.88 (q, *J* = 6.4 Hz, 1H), 2.05 (s, 1H), 1.49 (d, *J* = 6.4 Hz, 3H). <sup>13</sup>C NMR (100 MHz, CDCl<sub>3</sub>) δ 144.82, 131.48, 127.25, 121.03, 69.50, 25.19.

#### 5.1.5 1-(4-tolyl)ethan-1-ol (entry 6, Table 4)

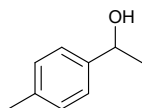

57% yield, Colorless oil, <sup>1</sup>H NMR (400 MHz, CDCl<sub>3</sub>) δ 7.32 (d, *J* = 8 Hz, 2H), 7.214 (d, *J* = 8 Hz, 2H), 4.91 (q, *J* = 6.4 Hz, 1H), 2.40 (s, 3H), 1.88 (s, 1H), 1.53 (d, *J* = 6.4 Hz, 3H); <sup>13</sup>C NMR (100 MHz, CDCl<sub>3</sub>) δ 142.92, 137.18, 129.22, 125.38, 70.29, 25.11, 21.12.

#### 5.1.6 1-(4-methoxyphenyl)ethan-1-ol (entry 8, Table 4)

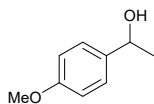

75% yield, colorless oil,  $^1\text{H NMR}$  (400 MHz,  $\text{CDCl}_3$ )  $\delta$  7.36-7.31 (m, 2H), 6.95-6.92 (m, 2H), 4.90 (q,  $J = 6.4$  Hz, 1H), 3.85 (s, 1H), 1.88 (brs, 1H), 1.53 (d,  $J = 6.4$  Hz, 3H);  $^{13}\text{C NMR}$  (100 MHz,  $\text{CDCl}_3$ )  $\delta$  159.00, 138.03, 126.74, 126.66, 113.90, 113.83, 70.02, 55.30, 25.05.

#### 5.1.7 1-(3-chlorophenyl)ethan-1-ol (entry 11, Table 4)

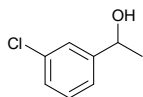

91% yield, Colorless oil,  $^1\text{H NMR}$  (400 MHz,  $\text{CDCl}_3$ )  $\delta$  7.44-7.42 (m, 1H), 7.34-7.28 (m, 3H), 4.93 (q,  $J = 6.4$  Hz, 1H), 1.94 (s, 1H), 1.54 (d,  $J = 6.4$  Hz, 3H);  $^{13}\text{C NMR}$  (100 MHz,  $\text{CDCl}_3$ )  $\delta$  148.00, 134.34, 129.85, 127.64, 125.63, 123.69, 69.68, 25.26.

#### 5.1.8 1-(3-bromophenyl)ethan-1-ol (entry 11, Table 4)

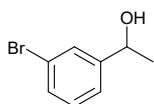

88% yield, colorless oil,  $^1\text{H NMR}$  (400 MHz,  $\text{CDCl}_3$ )  $\delta$  7.58-7.55 (m, 1H), 7.46-6.42 (m, 1H), 7.34-7.31 (m, 1H), 7.27-7.24 (m, 1H), 4.90 (q,  $J = 6.4$  Hz, 1H), 2.05 (brs, 1H), 1.52 (d,  $J = 6.4$  Hz, 3H).  $^{13}\text{C NMR}$  (100 MHz,  $\text{CDCl}_3$ )  $\delta$  148.20, 130.42, 130.14, 128.66, 124.14, 122.59, 69.58, 25.24.

#### 5.1.9 1-(2-chlorophenyl)ethan-1-ol (entry 18, Table 4)

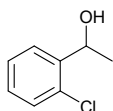

89% yield, colorless oil,  $^1\text{H NMR}$  (400 MHz,  $\text{CDCl}_3$ )  $\delta$  7.65-7.63 (m, 1H), 7.38-7.32 (m, 3H), 5.34 (q,  $J = 6.4$  Hz, 1H), 2.06 (brs, 1H), 1.54 (d,  $J = 6.4$  Hz, 3H);  $^{13}\text{C NMR}$  (100 MHz,  $\text{CDCl}_3$ )  $\delta$  143.21, 131.53, 129.35, 128.34, 127.22, 126.53, 66.86, 23.57.

#### 5.1.10 1-(1-tolyl)ethan-1-ol (entry 22, Table 4)

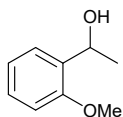

64% yield, white solid,  $^1\text{H NMR}$  (400 MHz,  $\text{CDCl}_3$ )  $\delta$  7.40-7.38 (m, 1H), 7.32-7.28 (m, 1H), 7.03-6.99 (m, 1H), 6.79 (d,  $J = 8.4$  Hz, 1H), 5.14 (q,  $J = 6.4$  Hz, 1H), 4.92 (s, 3H), 2.69 (brs, 1H), 1.56 (d,  $J = 6.4$  Hz, 3H);  $^{13}\text{C NMR}$  (100 MHz,  $\text{CDCl}_3$ )  $\delta$  156.45, 133.76, 128.25, 126.10, 120.85, 110.44, 66.15, 55.30, 23.11.

#### 5.1.11 1-(naphthalen-2-yl)ethan-1-ol (entry 8, Table 5)

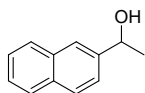

93% yield, white solid,  $^1\text{H}$  NMR (400 MHz,  $\text{CDCl}_3$ )  $\delta$  7.90-7.86 (m, 4H), 7.57-7.51 (m, 3H), 5.12 (q,  $J = 6.4$  Hz, 1H), 1.90 (brs, 1H), 1.64 (d,  $J = 6.8$  Hz, 3H).  $^{13}\text{C}$  NMR (100 MHz,  $\text{CDCl}_3$ )  $\delta$  143.20, 133.35, 132.95, 128.38, 127.98, 127.73, 126.19, 125.85, 123.87, 123.82, 70.55, 25.18.

#### 5.1.12 1-(thiophen-2-yl)ethan-1-ol (entry 13, Table 5)

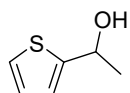

68% yield, brown oil,  $^1\text{H}$  NMR (400 MHz,  $\text{CDCl}_3$ )  $\delta$  7.31-7.28 (m, 1H), 7.03-7.00 (m, 2H), 5.18 (q,  $J = 6.4$  Hz, 1H), 2.11 (brs, 1H), 1.65 (d,  $J = 6.4$  Hz, 3H);  $^{13}\text{C}$  NMR (100 MHz,  $\text{CDCl}_3$ )  $\delta$  157.68, 141.92, 110.13, 105.11, 63.57, 21.26.



## 5.2. Copies of NMR spectra for the selected alcohol products

**Figure S20**  $^1\text{H}$  and  $^{13}\text{C}$  NMR spectra of 1-phenylethanol in  $\text{CDCl}_3$

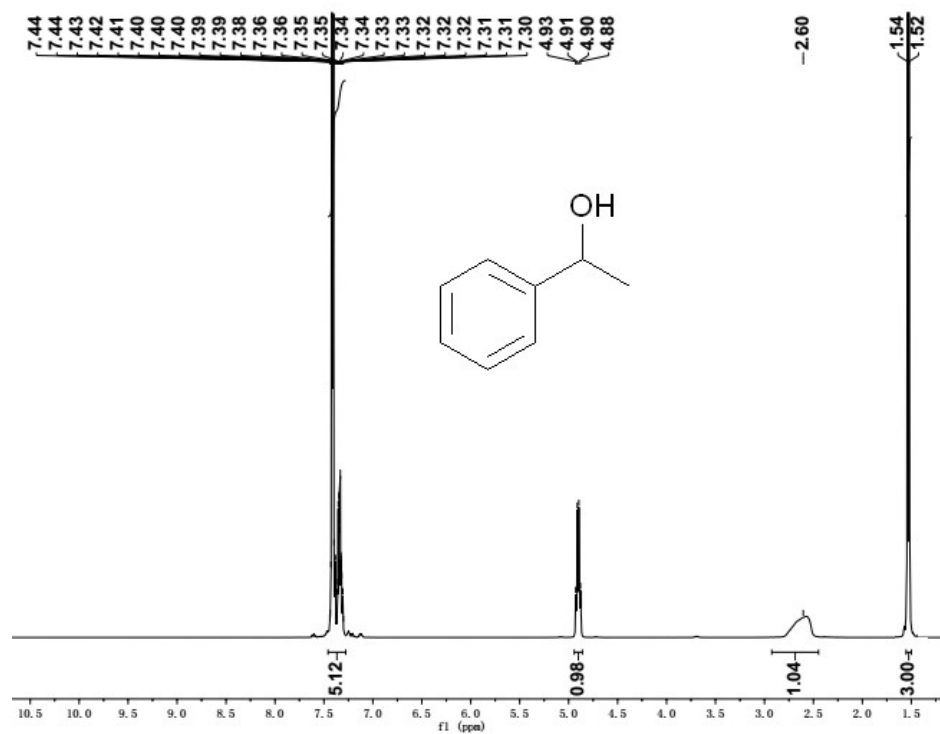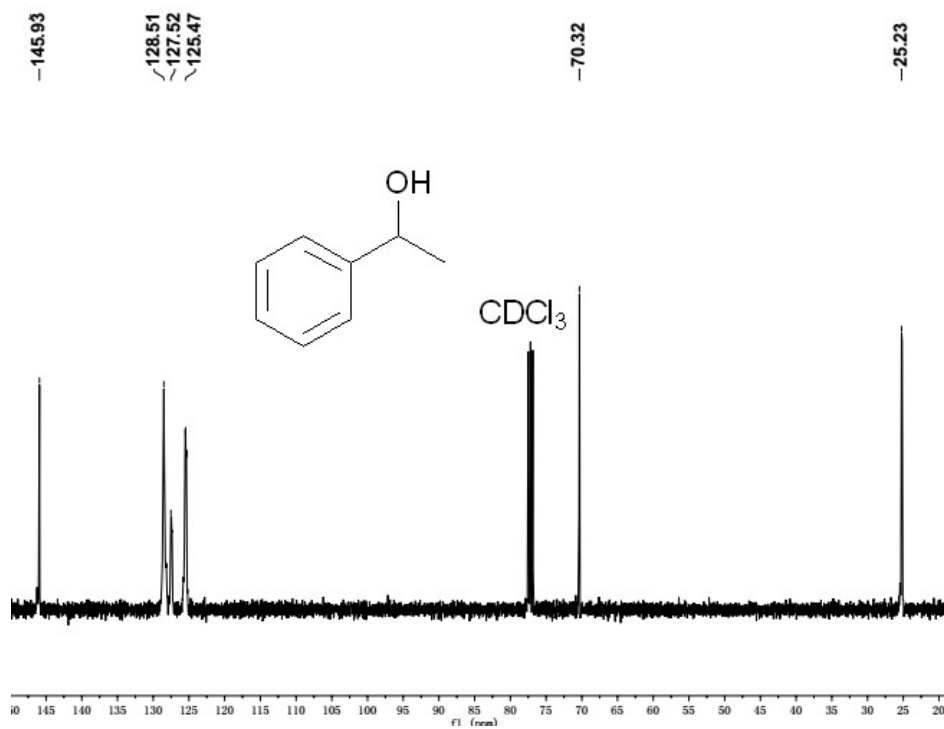

Figure S21  $^1\text{H}$  and  $^{13}\text{C}$  NMR spectra of 1-(4-fluorophenyl)ethan-1-ol in  $\text{CDCl}_3$

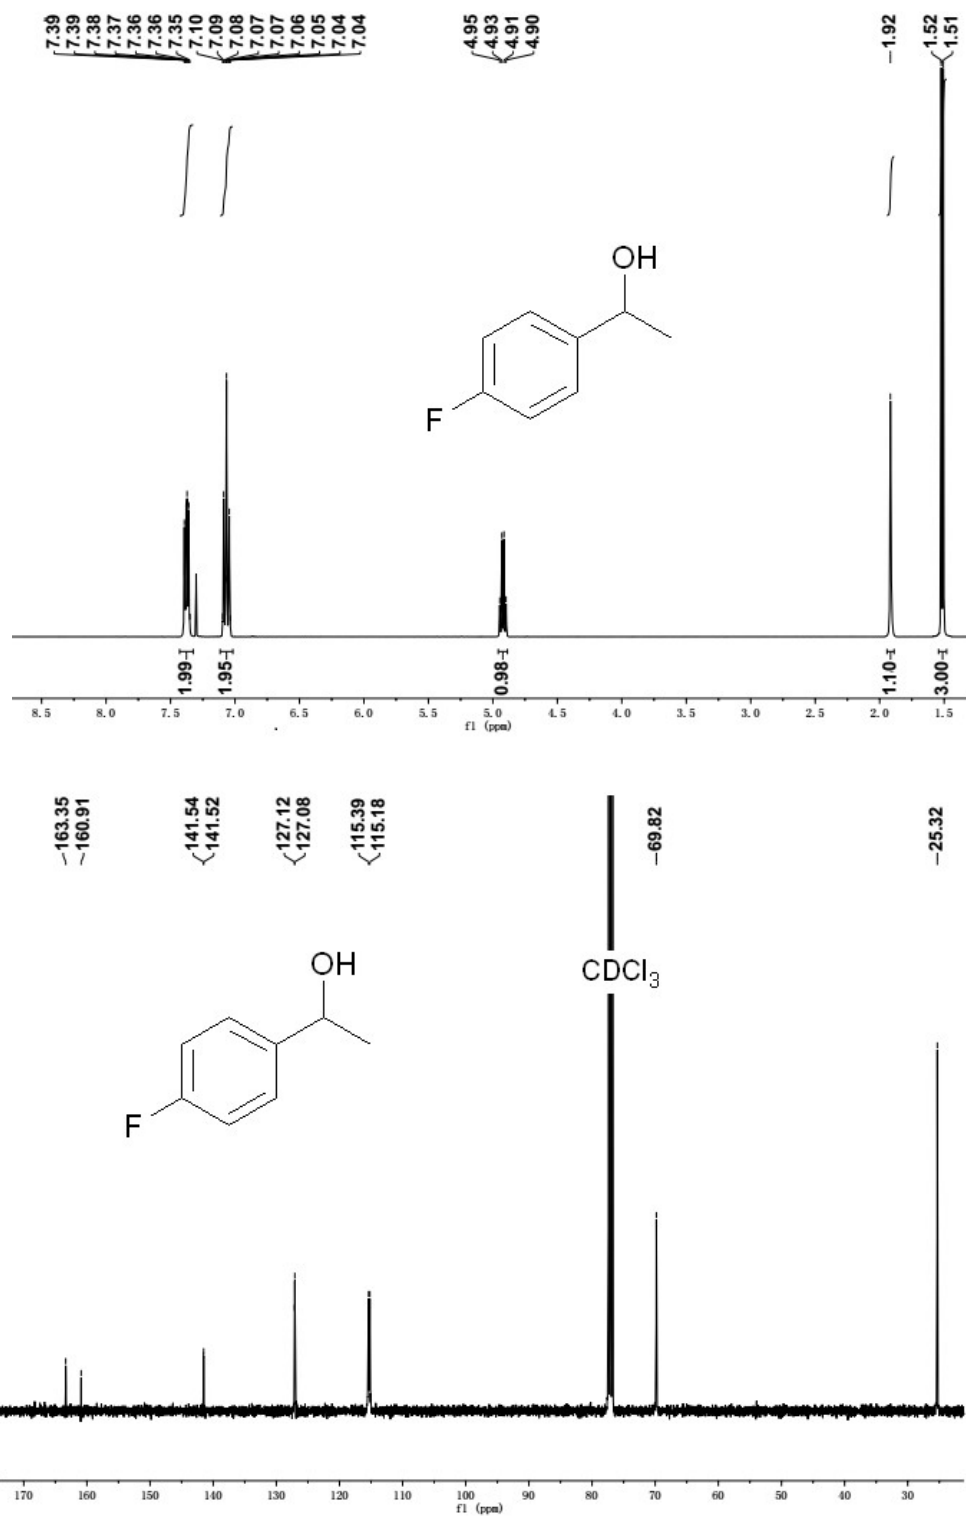

Figure S22  $^1\text{H}$  and  $^{13}\text{C}$  NMR spectra of 1-(4-chlorophenyl)ethan-1-ol in  $\text{CDCl}_3$

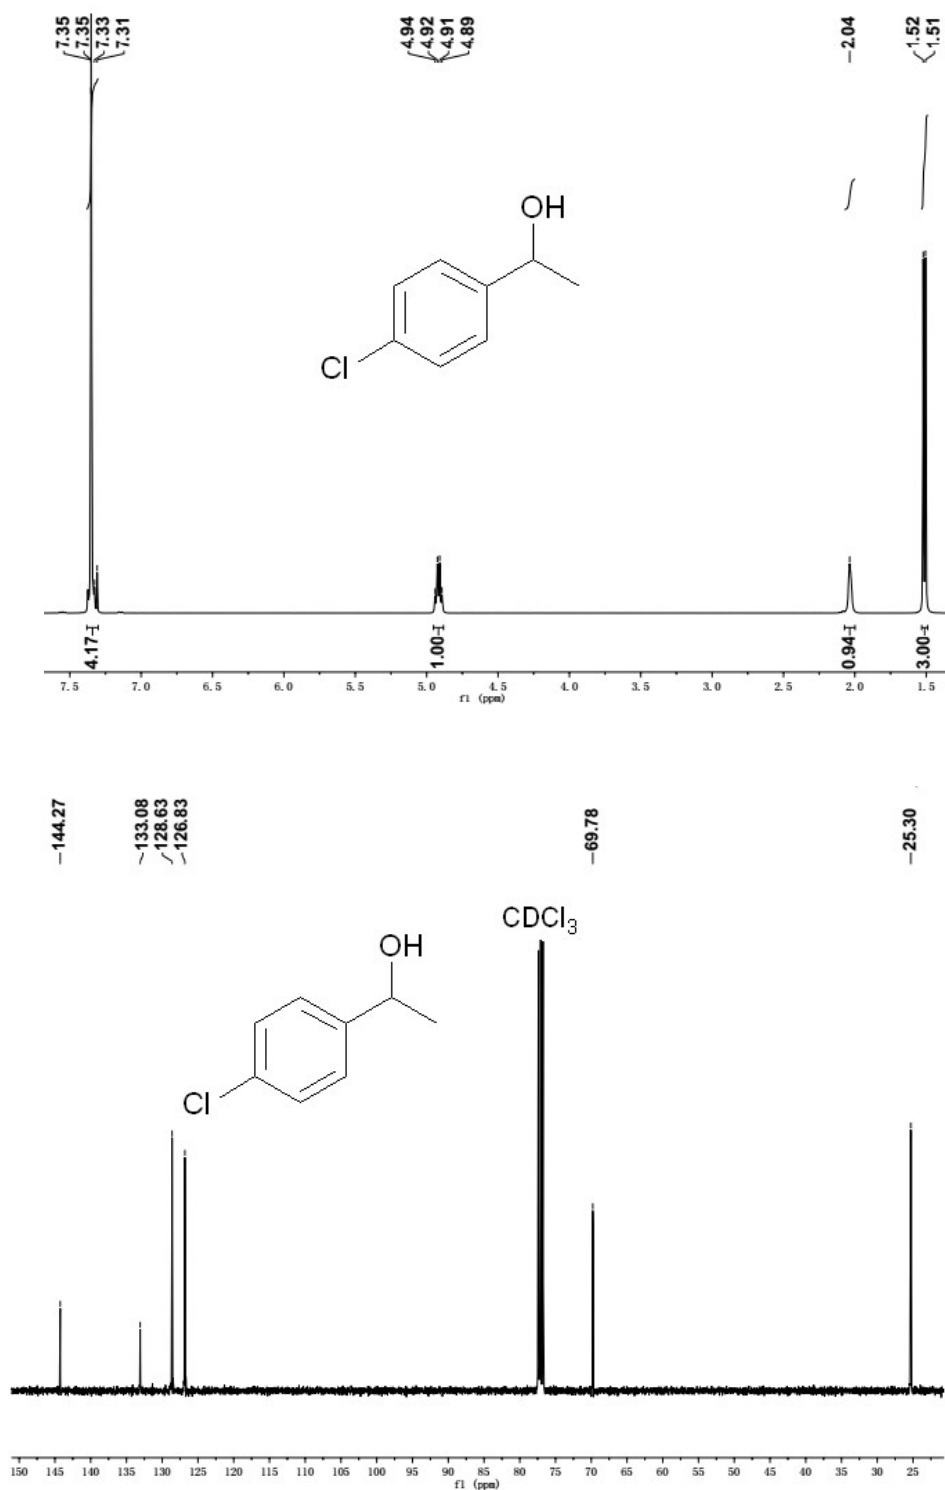

Figure S23  $^1\text{H}$  and  $^{13}\text{C}$  NMR spectra of 1-(4-bromophenyl)ethan-1-ol in  $\text{CDCl}_3$

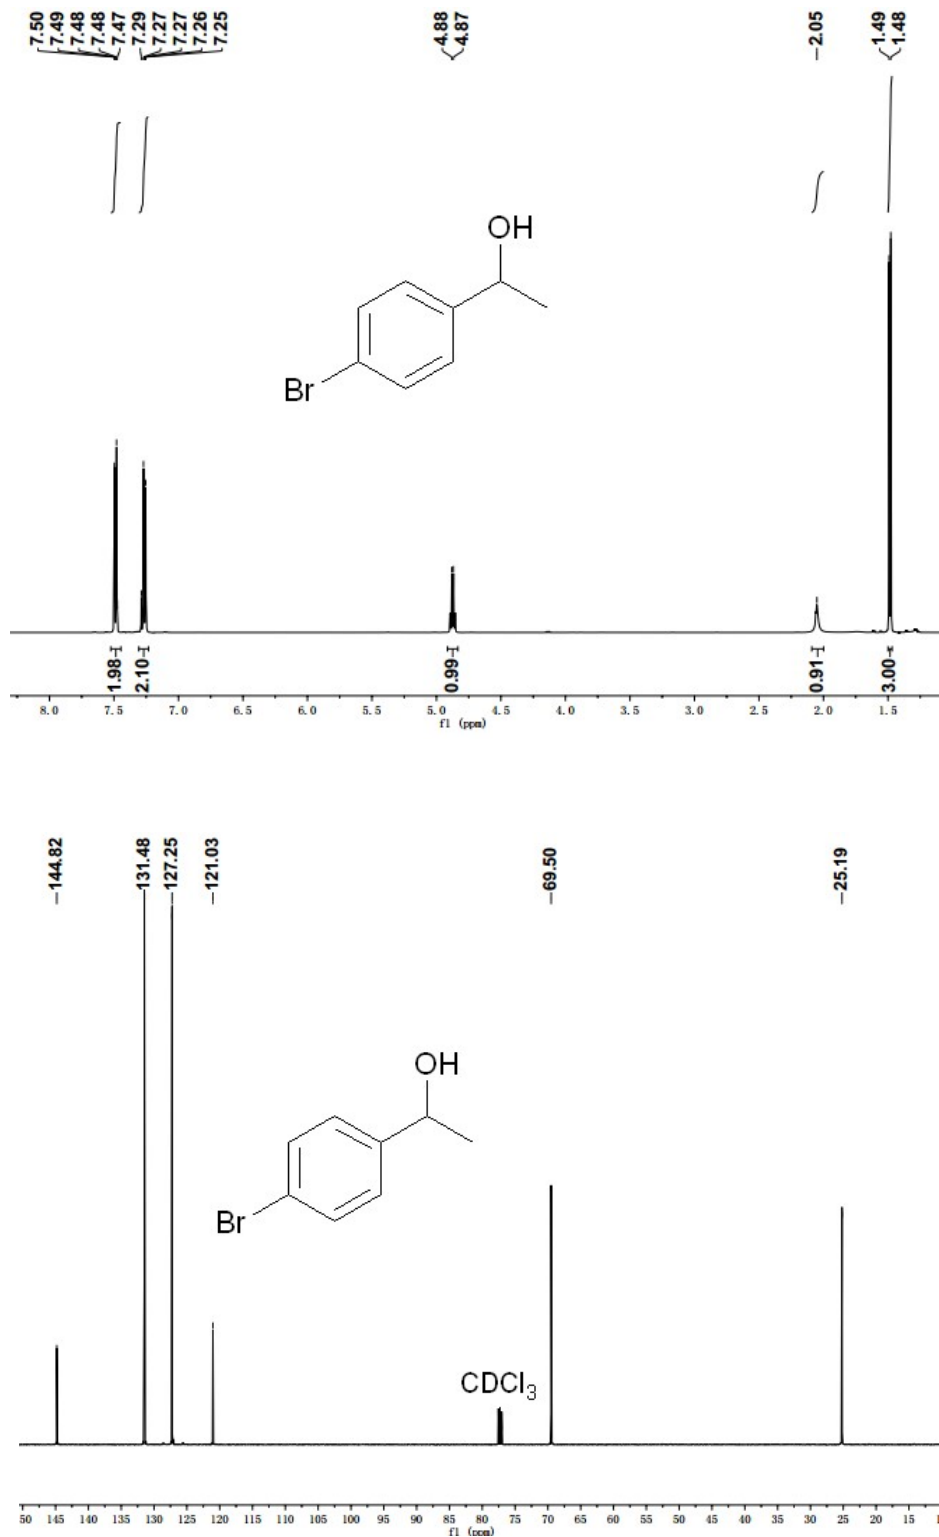

Figure S24  $^1\text{H}$  and  $^{13}\text{C}$  NMR spectra of 1-(p-tolyl)ethan-1-ol in  $\text{CDCl}_3$

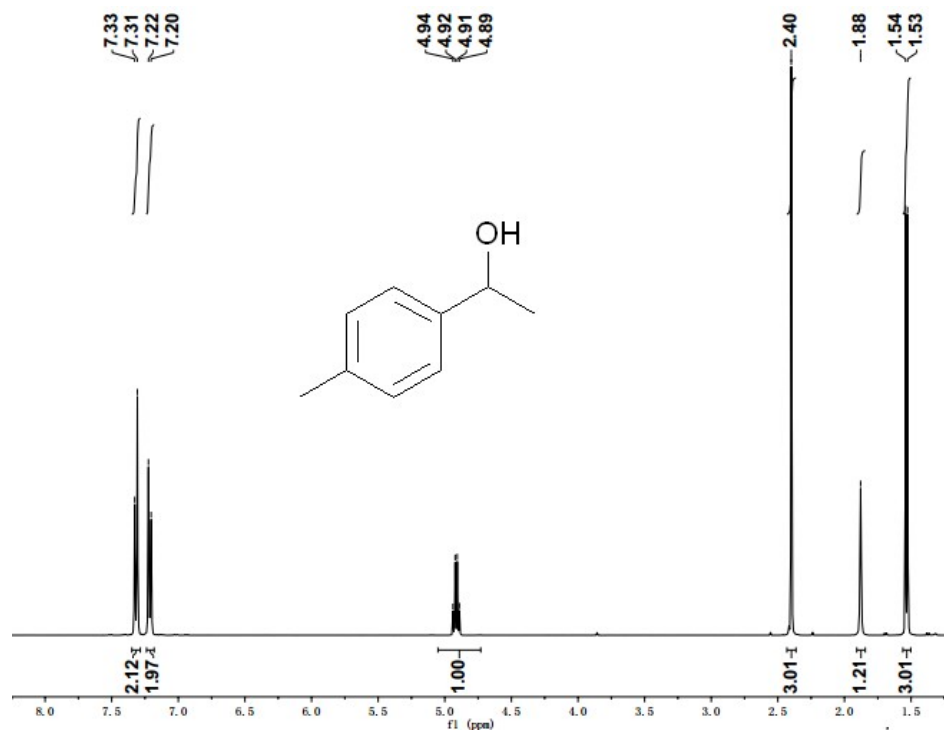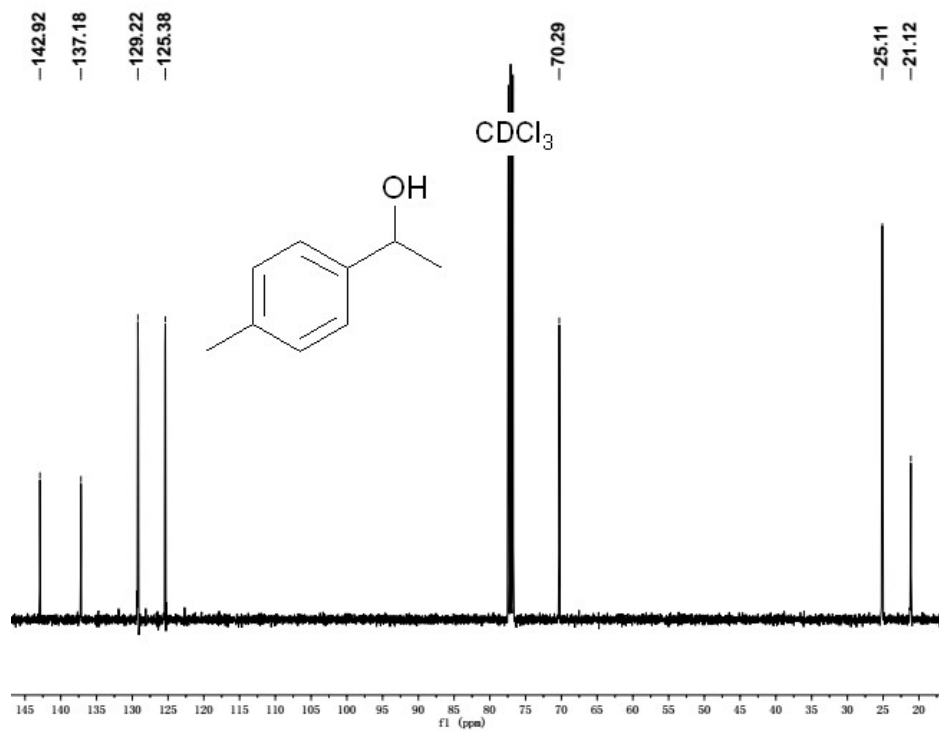

Figure S25  $^1\text{H}$  and  $^{13}\text{C}$  NMR spectra of 1-(4-methoxyphenyl)ethan-1-ol in  $\text{CDCl}_3$

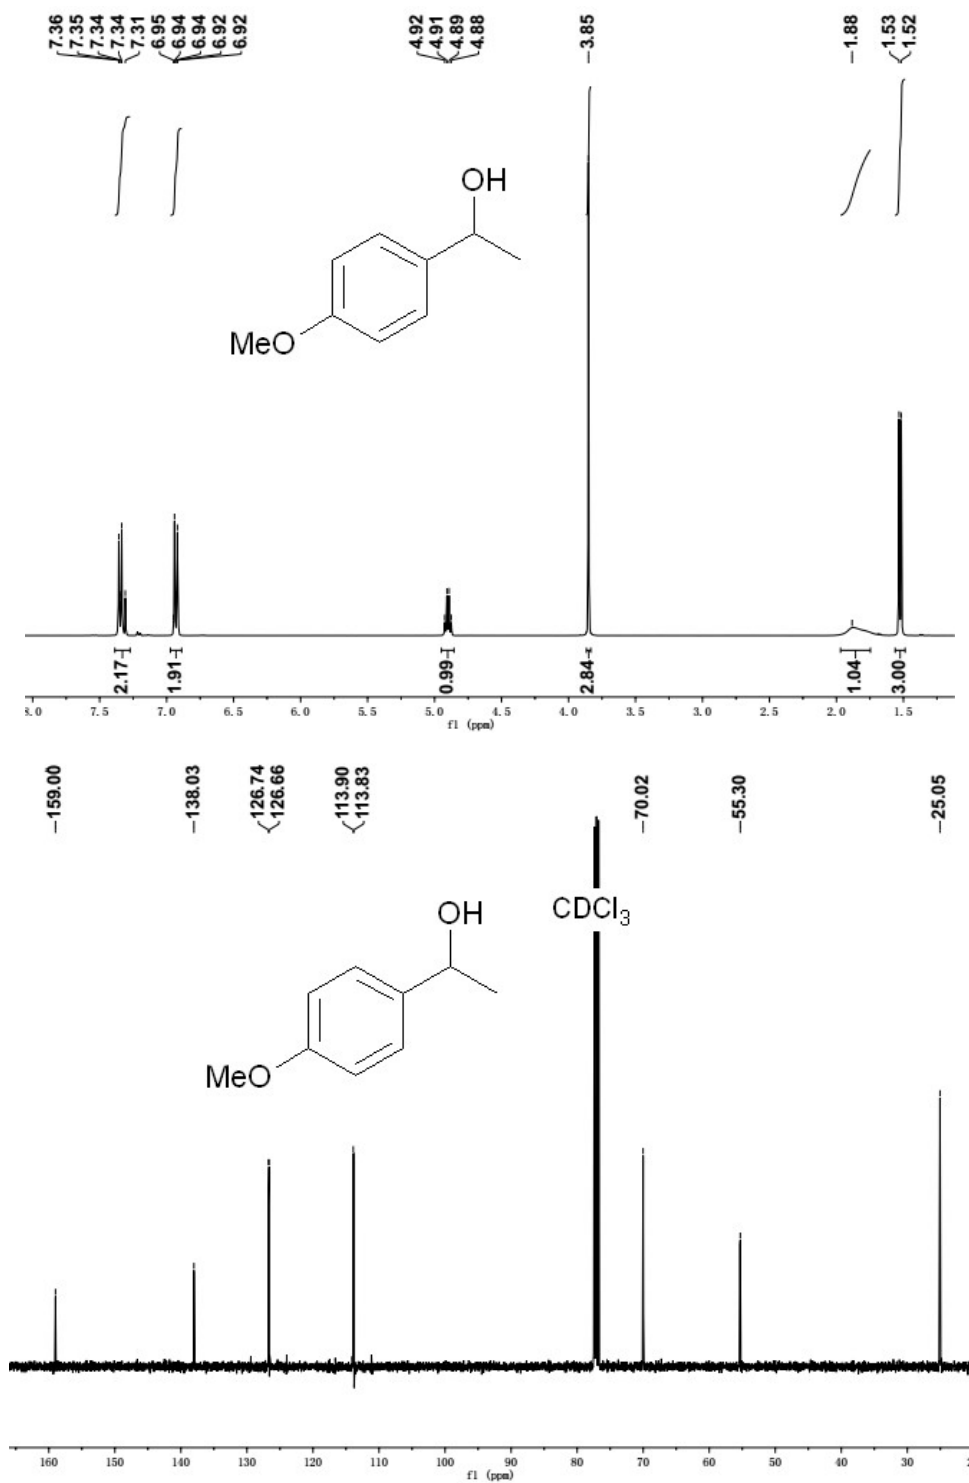

Figure S26  $^1\text{H}$  and  $^{13}\text{C}$  NMR spectra of 1-(3-chlorophenyl)ethan-1-ol

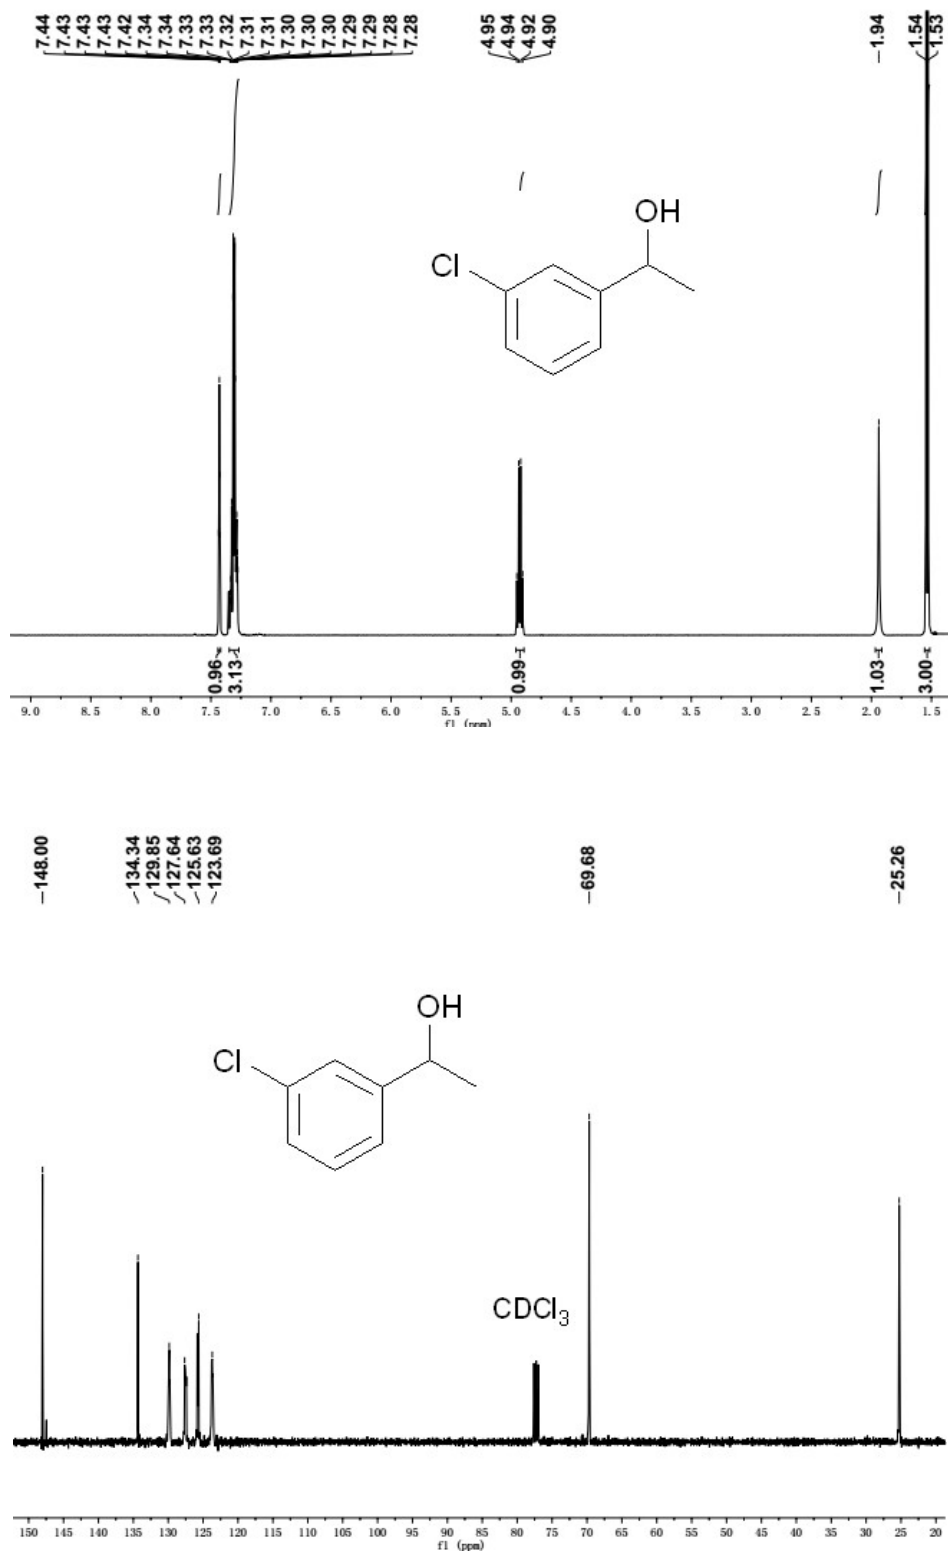

Figure S27  $^1\text{H}$  and  $^{13}\text{C}$  NMR spectra of 1-(3-bromophenyl)ethan-1-ol

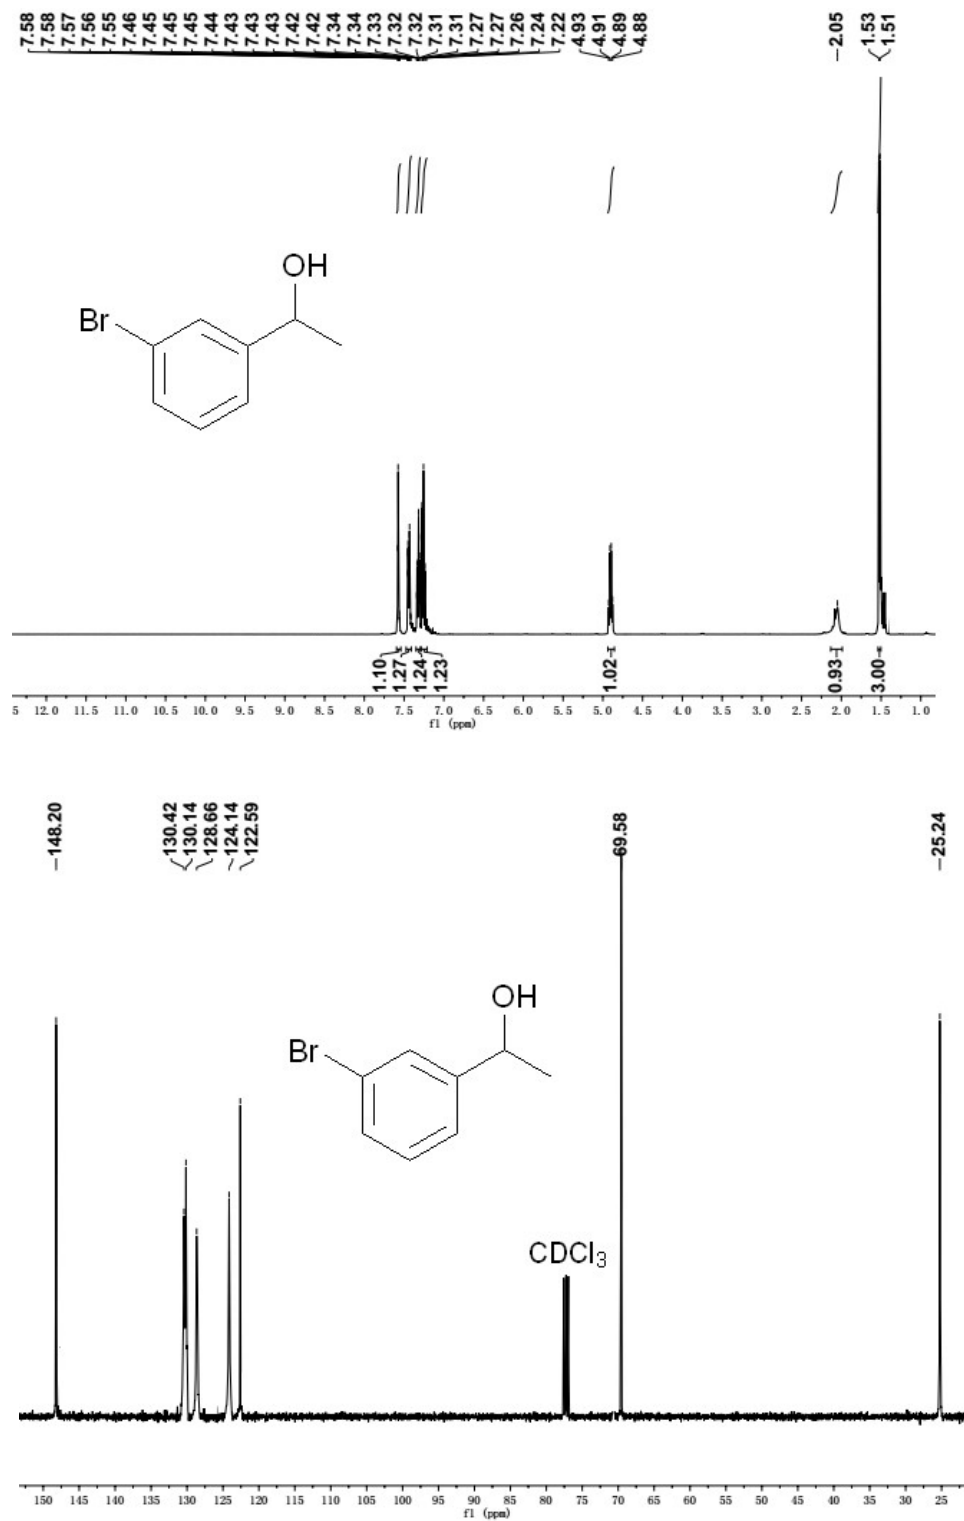



Figure S28  $^1\text{H}$  and  $^{13}\text{C}$  NMR spectra of 1-(2-chlorophenyl)ethan-1-ol

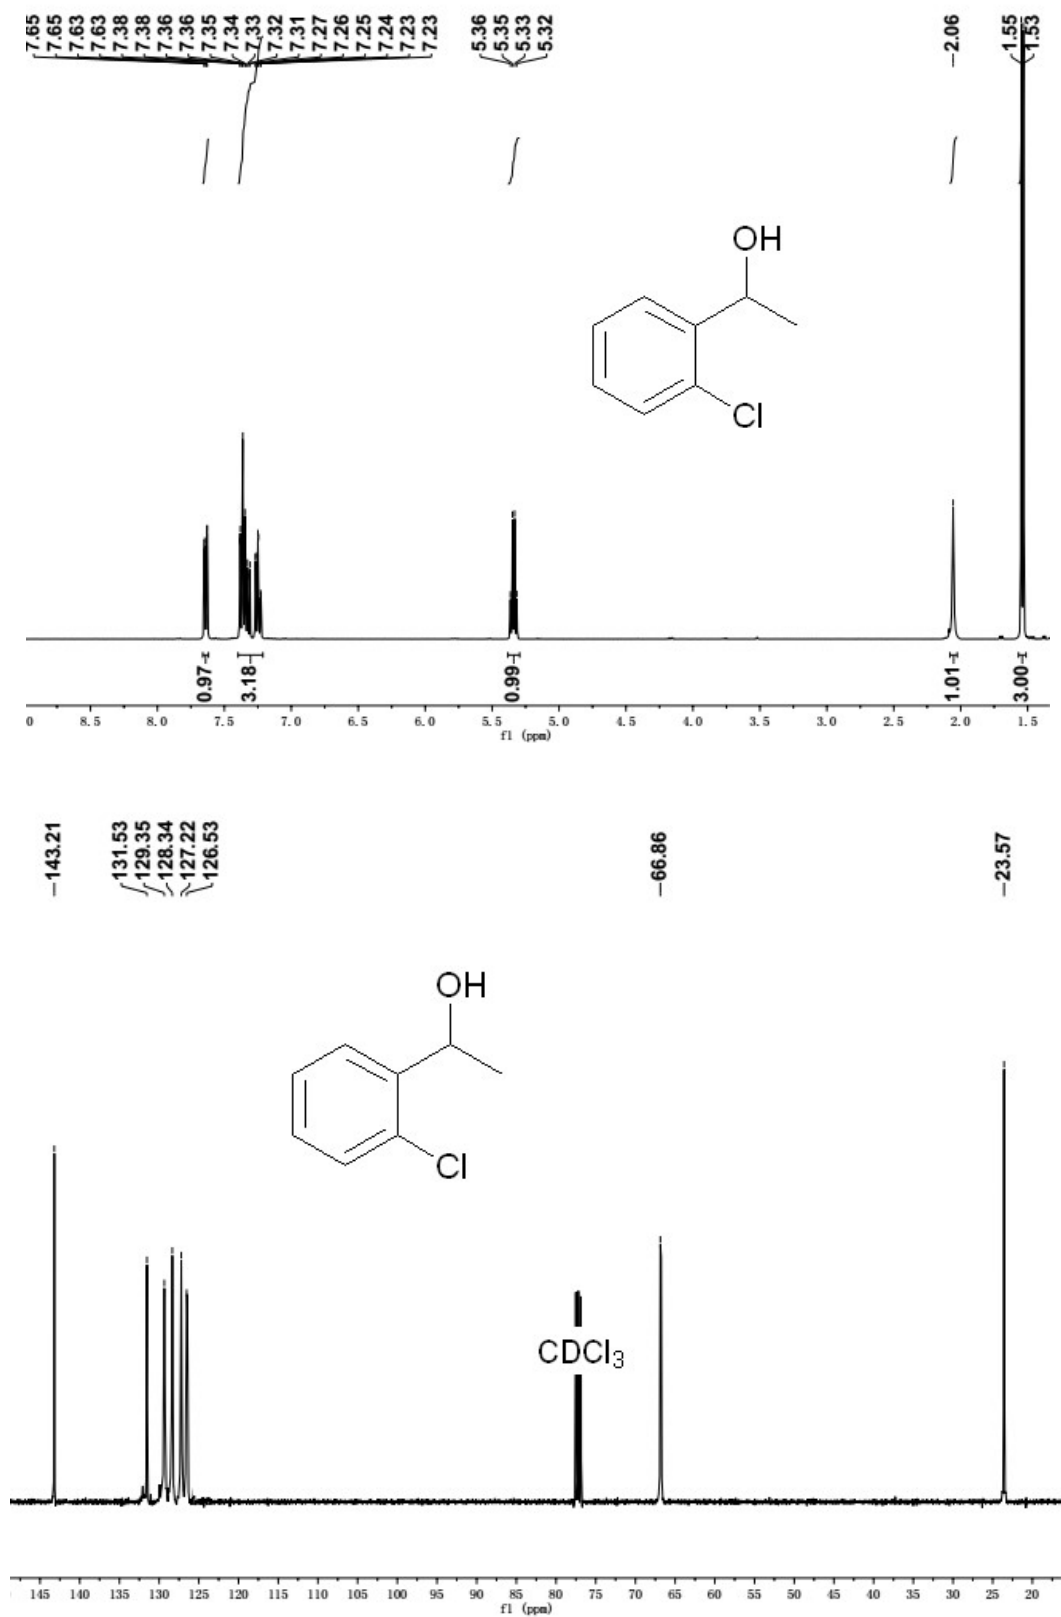

Figure S29  $^1\text{H}$  and  $^{13}\text{C}$  NMR spectra of 1-(1-tolyl)ethan-1-ol

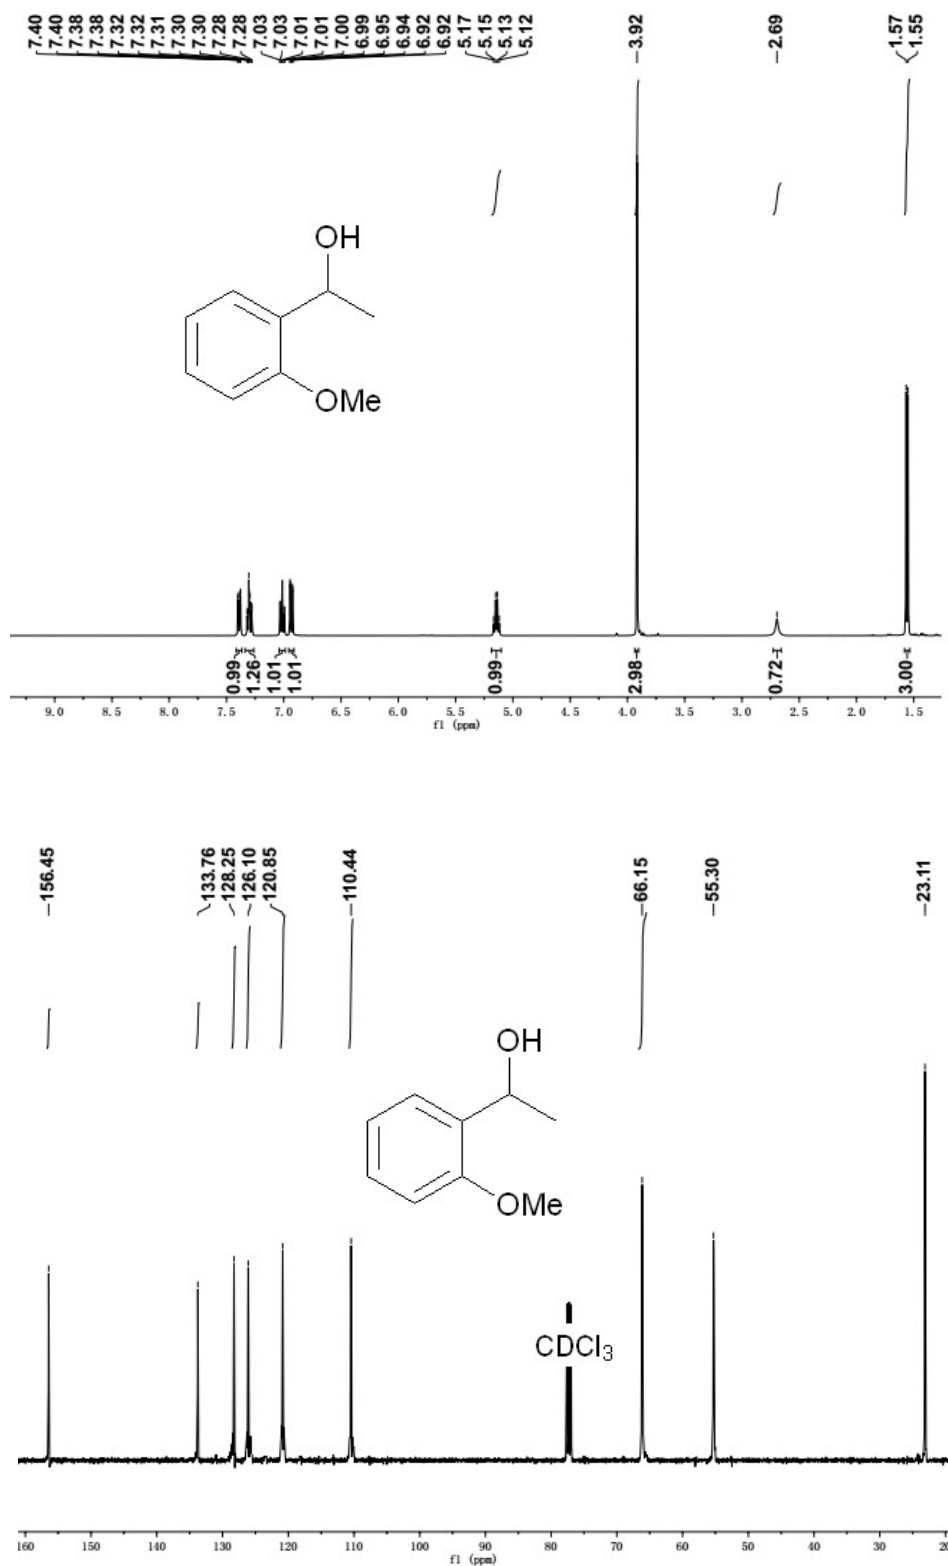

Figure S30  $^1\text{H}$  and  $^{13}\text{C}$  NMR spectra of 1-(naphthalen-2-yl)ethan-1-ol

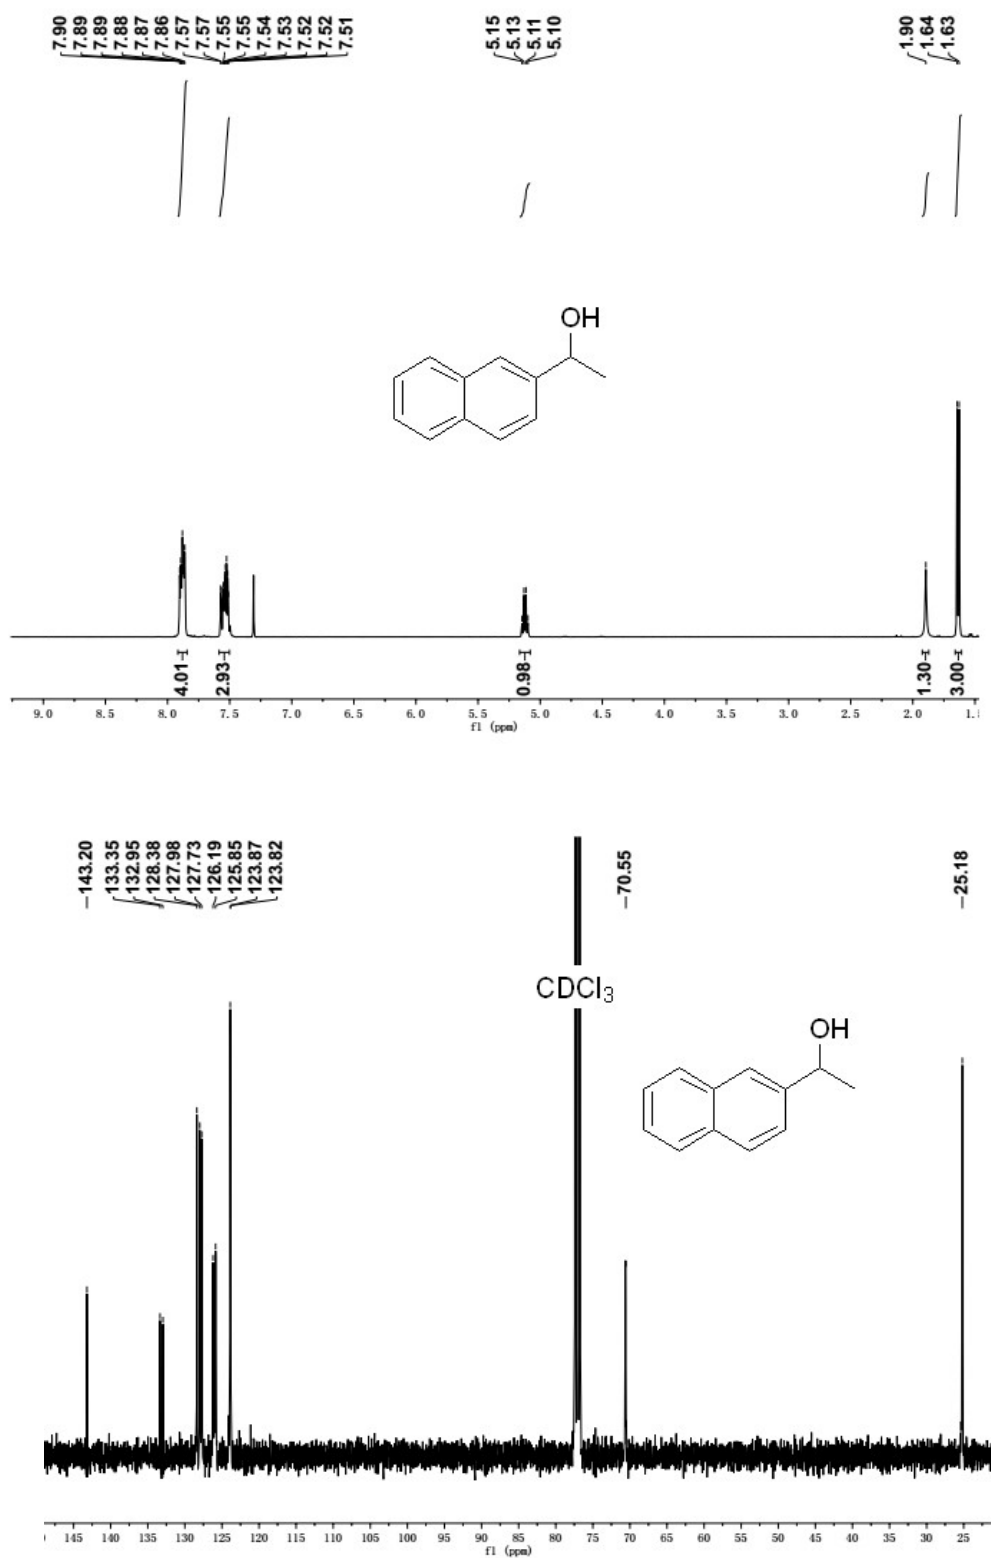

Figure S31  $^1\text{H}$  and  $^{13}\text{C}$  NMR spectra of 1-(thiophen-2-yl)ethan-1-ol

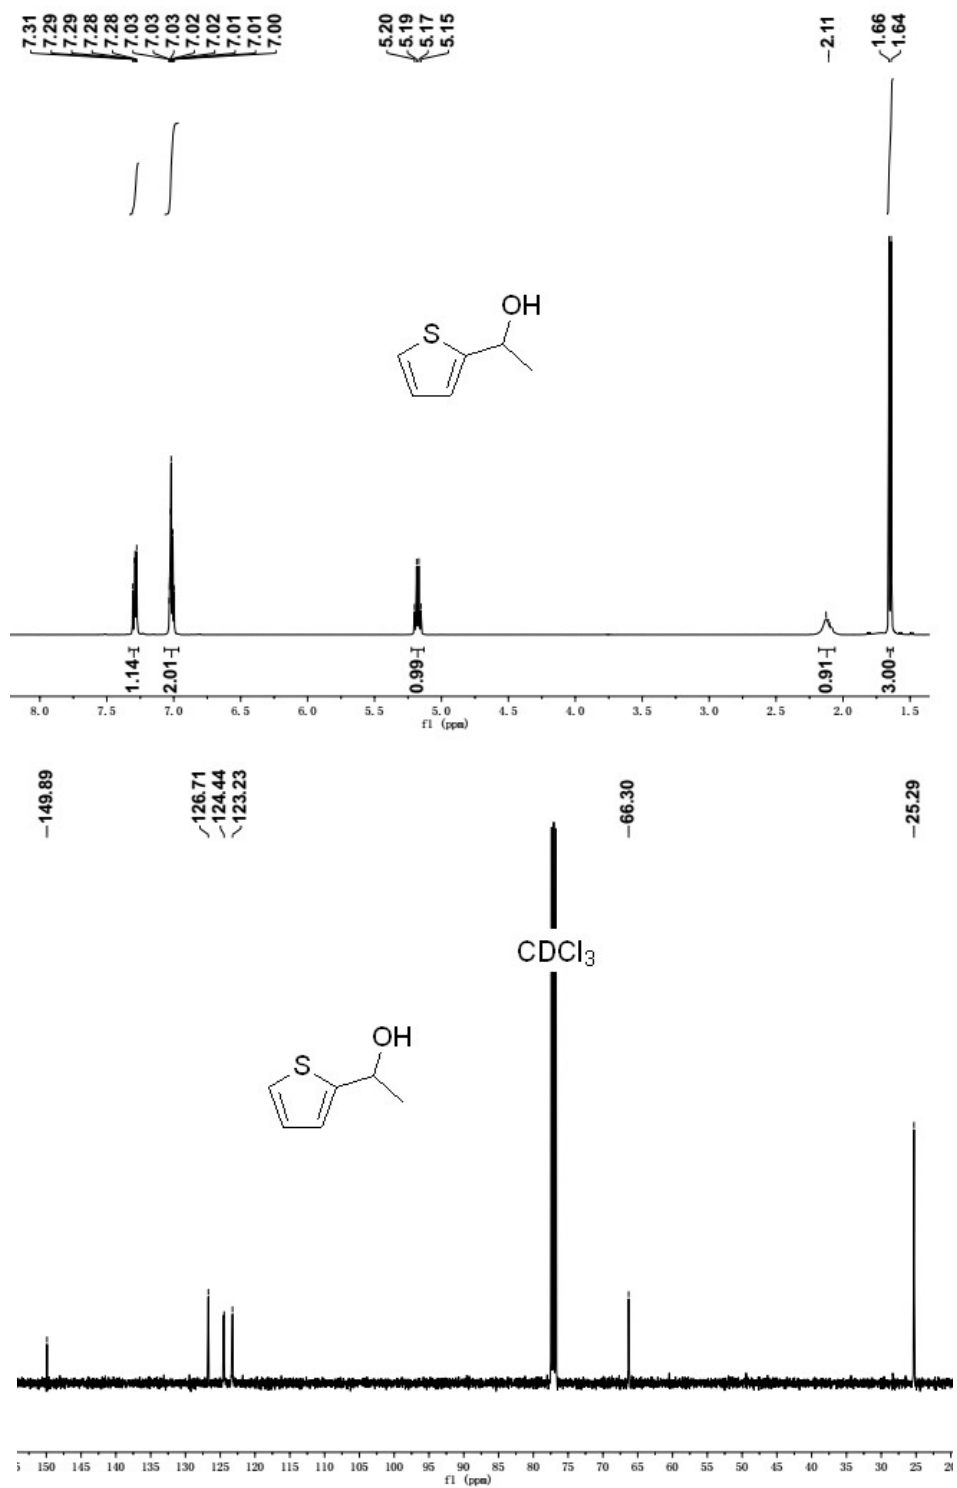

## 6. X-ray structure determination

**Table S4** crystal data and structure refinement for **Mo1**, **Mo3** and **Mo6**.

| Identification code                         | <b>Mo1</b>                                                       | <b>Mo3</b>                                                       | <b>Mo6</b>                                                        |
|---------------------------------------------|------------------------------------------------------------------|------------------------------------------------------------------|-------------------------------------------------------------------|
| CCDC                                        | 2164839                                                          | 2164840                                                          | 2164841                                                           |
| Empirical formula                           | C <sub>16</sub> H <sub>21</sub> MoN <sub>3</sub> O <sub>3</sub>  | C <sub>21</sub> H <sub>29</sub> MoN <sub>3</sub> O <sub>4</sub>  | C <sub>22</sub> H <sub>35</sub> BrMoN <sub>3</sub> O <sub>2</sub> |
| Formula weight                              | 399.30                                                           | 483.41                                                           | 548.37                                                            |
| Temperature/K                               | 170.00(11)                                                       | 169.99(10)                                                       | 169.99(13)                                                        |
| Crystal system                              | triclinic                                                        | monoclinic                                                       | monoclinic                                                        |
| Space group                                 | P-1                                                              | Ia                                                               | P <sub>2</sub> /c                                                 |
| a/Å                                         | 8.2042(2)                                                        | 14.5555(2)                                                       | 13.78177(12)                                                      |
| b/Å                                         | 8.6141(2)                                                        | 10.47576(13)                                                     | 8.83757(7)                                                        |
| c/Å                                         | 12.2400(4)                                                       | 15.7041(2)                                                       | 19.27005(17)                                                      |
| α/°                                         | 83.525(2)                                                        | 90                                                               | 90                                                                |
| β/°                                         | 78.867(2)                                                        | 109.6233(17)                                                     | 98.1502(9)                                                        |
| γ/°                                         | 78.108(2)                                                        | 90                                                               | 90                                                                |
| Volume/Å <sup>3</sup>                       | 828.13(4)                                                        | 2255.48(6)                                                       | 2323.34(4)                                                        |
| Z                                           | 2                                                                | 4                                                                | 4                                                                 |
| ρ <sub>calc</sub> /g/cm <sup>3</sup>        | 1.601                                                            | 1.4235                                                           | 1.5676                                                            |
| μ/mm <sup>-1</sup>                          | 6.637                                                            | 5.008                                                            | 6.804                                                             |
| F(000)                                      | 408.0                                                            | 1002.5                                                           | 1119.5                                                            |
| Crystal size/mm <sup>3</sup>                | 0.35 × 0.25 × 0.2                                                | 0.15 × 0.12 × 0.08                                               | 0.24 × 0.18 × 0.12                                                |
| Radiation                                   | CuKα (λ = 1.54184)                                               | CuKα (λ = 1.54184)                                               | CuKα (λ = 1.54184)                                                |
| 2θ range for data collection/               | 7.382 to 150.828                                                 | 10.34 to 150.08°                                                 | 6.48 to 150.46°                                                   |
| Index ranges                                | -10 ≤ h ≤ 9, -10 ≤ k ≤ 10,<br>-12 ≤ l ≤ 15                       | -18 ≤ h ≤ 18, -11 ≤ k ≤<br>12, -19 ≤ l ≤ 17                      | -17 ≤ h ≤ 17, -8 ≤ k ≤ 10,<br>-24 ≤ l ≤ 24                        |
| Reflections collected                       | 9490                                                             | 7902                                                             | 17413                                                             |
| Independent reflections                     | 3261 [R <sub>int</sub> = 0.0171,<br>R <sub>sigma</sub> = 0.0156] | 3542 [R <sub>int</sub> = 0.0181,<br>R <sub>sigma</sub> = 0.0200] | 4623 [R <sub>int</sub> = 0.0272,<br>R <sub>sigma</sub> = 0.0207]  |
| Data/restraints/parameters                  | 3261/0/210                                                       | 3542/0/266                                                       | 4623/0/265                                                        |
| Goodness-of-fit on F <sup>2</sup>           | 1.052                                                            | 1.038                                                            | 1.010                                                             |
| Final R indexes [I ≥ 2σ (I)]                | R <sub>1</sub> = 0.0192, wR <sub>2</sub> = 0.0493                | R <sub>1</sub> = 0.0189, wR <sub>2</sub> = 0.0509                | R <sub>1</sub> = 0.0280, wR <sub>2</sub> = 0.0771                 |
| Final R indexes [all data]                  | R <sub>1</sub> = 0.0193, wR <sub>2</sub> = 0.0493                | R <sub>1</sub> = 0.0190, wR <sub>2</sub> = 0.0510                | R <sub>1</sub> = 0.0292, wR <sub>2</sub> = 0.0778                 |
| Largest diff. peak/hole / e Å <sup>-3</sup> | 0.37/-0.50                                                       | 0.35/-0.43                                                       | 0.44/-0.85                                                        |

## 7. Reference

- (1) S. Anderson, D. J. Cook, and A. F. Hill, *Organometallics*, 2001, **20**, 2468-2476.
- (2) (a) J. Ellermann, M. Moll and N. Will, *J. Organomet. Chem.*, 1989, **378**, 73-79; (b) O. Oztopcu, C. Holzhaecker, M. Puchberger, M. Weil, K. Mereiter, L. F. Veiros and K. Kirchner, *Organometallics*, 2013, **32**, 3042-3052.
- (3) Z. Wang, Q. Lin, N. Ma, S. Liu, M. Han, X. Yan, Q. Liu, G. A. Solan, and W. -H. Sun, *Catal. Sci. Technol.*, 2021, **11**, 8026–8036.
- (4) (a) S. Chakraborty, O. Blacque, T. Fox and H. Berke, *Chem. Asian J.*, 2014, **9**, 328-337; (b) Z. Wang, X. Chen, B. Liu, Q. Liu, G. A. Solan, X. Yang and W.-H. Sun, *Catal. Sci. Technol.*, 2017, **7**, 1297-1304
